# Supplementary material for: Prognostic Modelling Studies of Coronary Heart Disease—A Systematic Review of Conventional and Genetic Risk Factor Studies
Source: MDPI journal article supplement (doi:10.3390/jcdd9090295), 2022-09-05
Supplement: s1 [file s1]

# Prognostic Modelling Studies of Coronary Heart Disease—A Systematic Review of Conventional and Genetic Risk Factor Studies

Nayla Nasr <sup>1,2</sup> Beáta Soltész <sup>3</sup>, János Sándor <sup>2</sup>, Róza Adány <sup>1,2</sup> and Szilvia Fialat <sup>2,\*</sup>

<sup>1</sup> Doctoral School of Health Sciences, University of Debrecen, 4032 Debrecen, Hungary

<sup>2</sup> Department of Public Health and Epidemiology, Faculty of Medicine, University of Debrecen, 4032 Debrecen, Hungary

<sup>3</sup> Faculty of Public Health, University of Debrecen, 4032 Debrecen, Hungary

\* Correspondence: fialat.szilvia@med.unideb.hu

## Details of the selection process:

According to our objective we selected articles describing the prognostic modelling studies of CHD in the general population (subjects are free from CHD). Cohort studies (n= 66) and nested case control studies (n= 6) were included in the systematic review because the prospective studies allow the optimal documentation of predictors and outcomes. Case-control studies are not suitable according to the recommendations, therefore were excluded (Moons et.al, 2014).

## The items of PICO framework:

P: People free of coronary heart disease

I: Developmental prediction models

C: Validation prediction models

O: Incidence of CHD within a specified time interval.

## Questions of interest:

What is the optimal model or how good is a model in predicting CHD risk?

Which biomarkers/genetic markers should be incorporated in the risk prediction model beside the conventional factors?

Will the genetic information improve risk prediction?

## Hypothesis:

Adding the genetic risk score (GRS) to the conventional risk factor (TRF) based models would improve the ability of these models to precisely predict CHD events.

## Data Extraction:

The CHARMS checklist and GRIPS guideline were used

## Study designs included:

Cohort studies nested case control and case-cohort.

## Modelling of interest:

Three types of predictive modelling studies included: 1. Developmental, 2. Validation modelling and 3. Developmental validation studies

## Population Description:

Describe the population selection criteria (inclusion and exclusion), race/ethnicity, geographical region, sample collection technique

## The follow-up and duration in the prediction modelling study:

Time interval is important to see whether the participants developed CHD. The duration of follow-up of prediction modelling studies started from zero-time to the end period of follow up that specified in the study. Follow-up and duration involved in prediction models should be described accurately in the study. Between the zero-time and the end of the follow-up researcher should do at least one more datum collection for accurate result (Moons et.al, 2015).

#### **Statistical analysis for prediction modelling studies:**

Logistic regression and proportional hazard regression analyses are required to describe the effect of the categorical predictors.

#### **Model performance:**

Models' performance can be assessed usually by using different method which included discrimination, calibration and reclassification measures. Discrimination measured by area under the receiver operating characteristic ROC curve (AUC), or concordance (or c) statistic; calibration measured by calibration slope, survival analysis (Hosmer-Lemeshow goodness-of-fit test), Grønnesby and Borgan test. Reclassification is measured by net reclassification improvement (NRI). The net reclassification index is a measure for evaluating the improvement in prediction performance gained by adding a marker to a set of baseline predictors.

#### **Risk categories in models included:**

Conventional models based on Framingham risk score categories described as: 10% (low), 10-20% (intermediate), 20% or more is (high) risk of CHD at 10 years. While genetic risk prediction modelling studies described the weighted risk categories as: 0-5% (low), >5-≤10% (intermediate-low), >10-≤20% (intermediate-high), >20% (high) it used.

**Table S1.** Describes the list of full-text articles identified and the reason of exclusion during the investigation of eligibility.

| No    | Study design          | Identified | Included | Not included | Exclusion reason                 |
|-------|-----------------------|------------|----------|--------------|----------------------------------|
| 1     | Longitudinal (Cohort) | 346        | 66       | 280          | Suspected patient/CVD and stroke |
| 2     | Case control          | 73         | 0        | 73           | Potential bias                   |
| 3     | Nested case control   | 7          | 6        | 1            | Intervention                     |
| 4     | Cross sectional       | 21         | 0        | 21           | Diagnostic models                |
| 5     | Case cohort study     | 5          | 0        | 5            | Poor quality (No follow up).     |
| 6     | Case report           | 2          | 0        | 2            | Short follow up                  |
| 7     | Blinded comparison    | 1          | 0        | 1            | Poor quality                     |
| 8     | Pooled analysis       | 9          | 0        | 9            | No value of use it               |
| 9     | No information        | 12         | 0        | 12           | Poor quality                     |
| Total |                       | 476        | 72       | 404          |                                  |

#### **Prediction models identified:**

Regarding to our objectives and PICO items work 72 articles described the prognostic models of CHD in healthy population is eligible for reviewing: which included 66 cohort study design and 6 nested case control, other models were excluded.

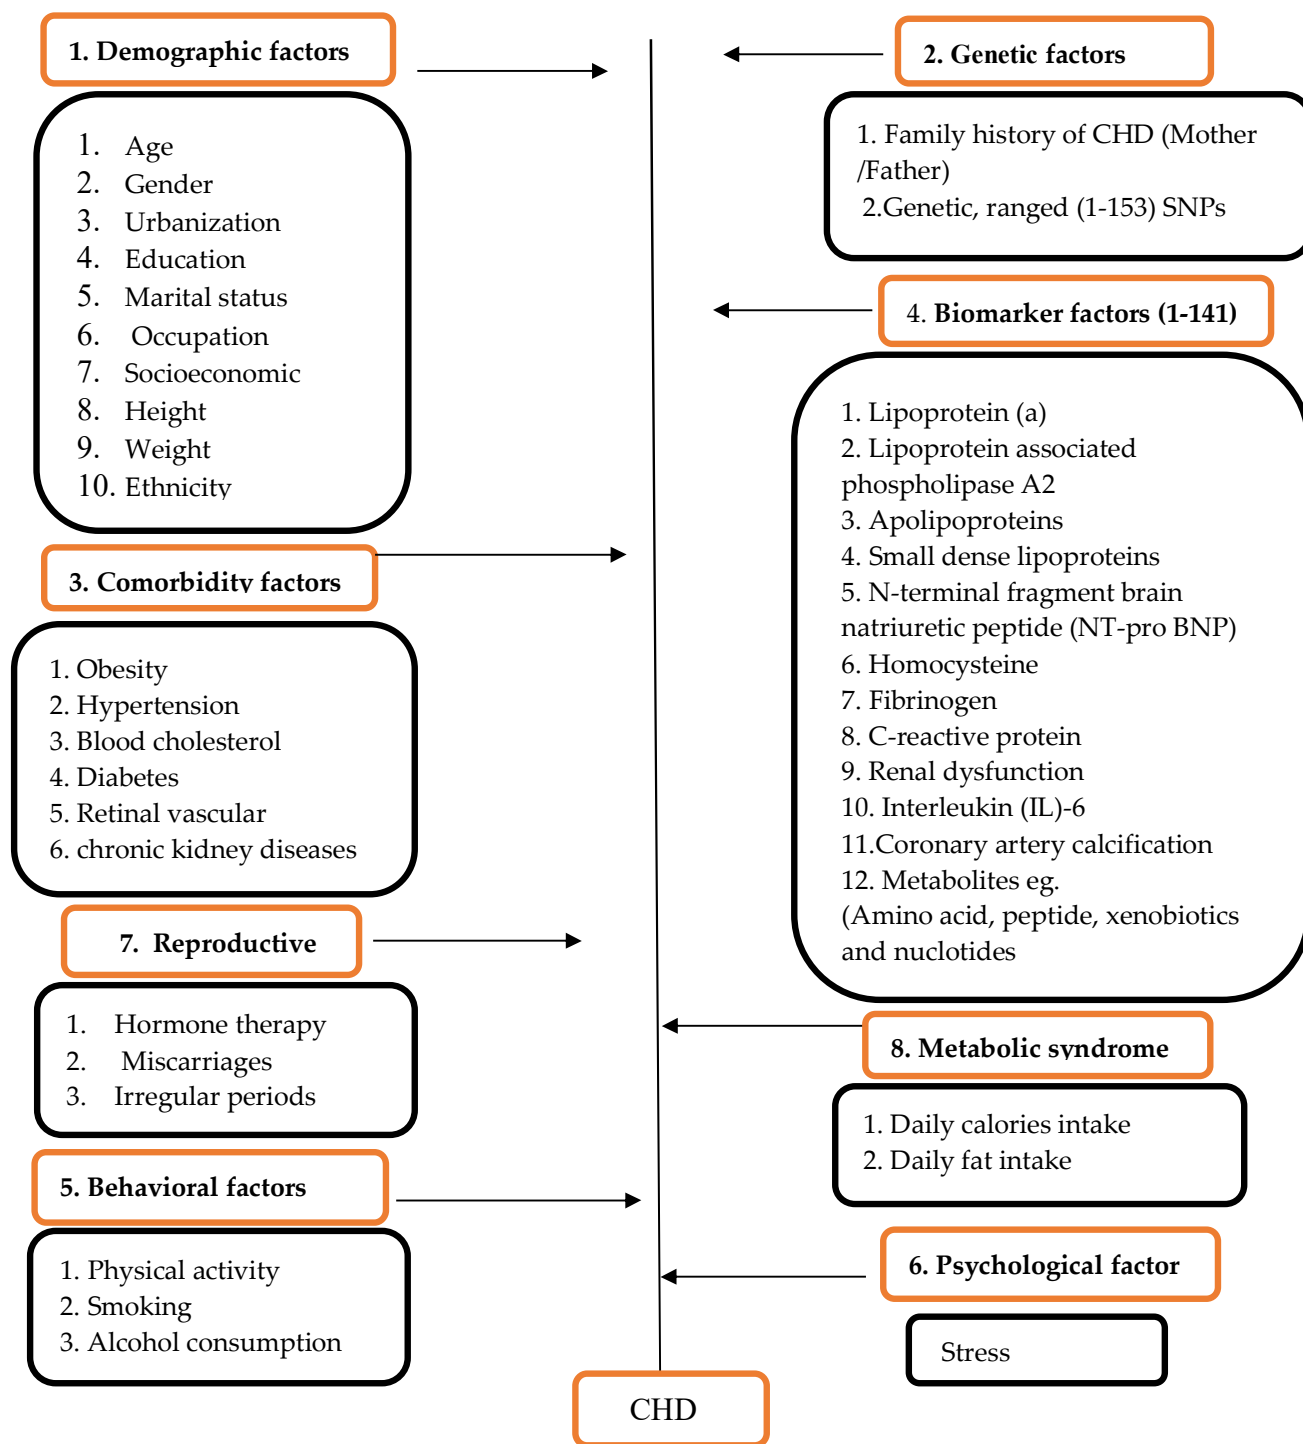

**Figure S1. Categories of predictors that reported in the models included in the review**

The predictors of CHD were reported in the models reviewed. They are categorised into different subgroups such as demographic, genetic, biomarker, comorbidity, behavioral, psychological, reproductive risk factors.

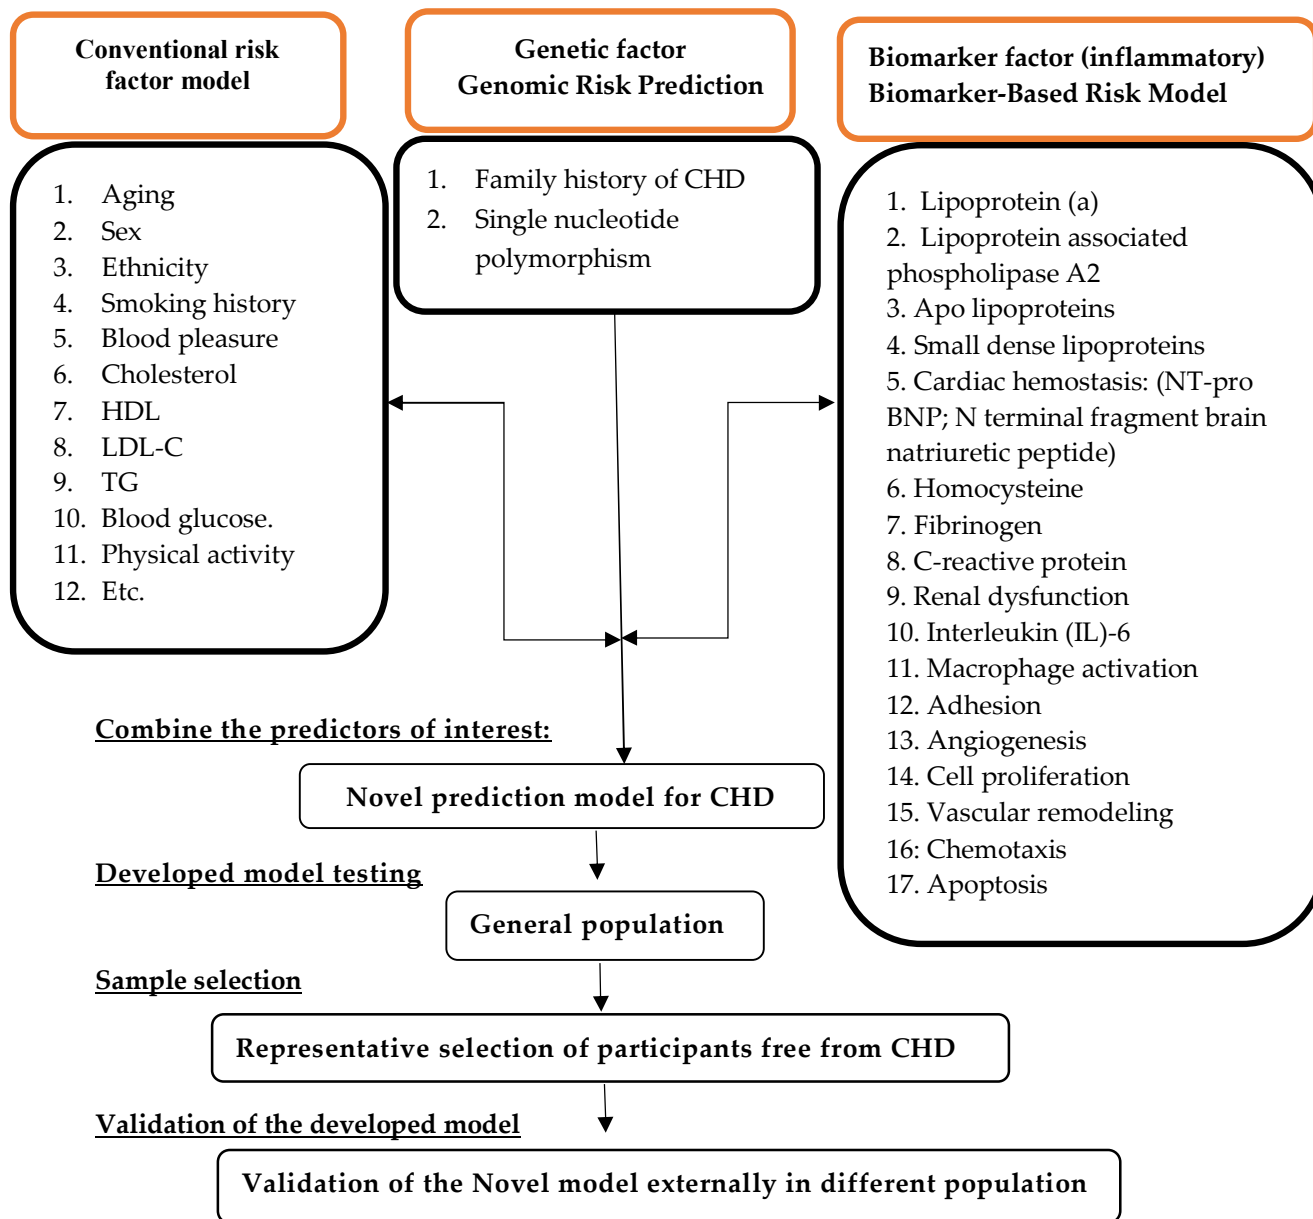

**Figure S2: The steps of developing a novel model**

The steps of developing novel model which includes: combining the predictors of interest, selecting the predictors to develop novel model for specific population/country, then developed model should be validated in other population/countries, assessing whether this model is optimal (valid and accurate) by measuring the performance (improvement in the discrimination, calibration and reclassification); then it can be used in clinical setting for CHD risk prediction in general population (generalizability).

**Table S2:** Description of the study populations, settings, locations, periods of recruitment, length of follow-up and method of data collection of the reviewed models.

| No | Populations                                                                                                                                                                                                                                                                                                                                                                                                                                                                                                                                                                                                                                                                |
|----|----------------------------------------------------------------------------------------------------------------------------------------------------------------------------------------------------------------------------------------------------------------------------------------------------------------------------------------------------------------------------------------------------------------------------------------------------------------------------------------------------------------------------------------------------------------------------------------------------------------------------------------------------------------------------|
| 1  | The GERA cohort study of Genetic Epidemiology Resource in Adult Health and Aging, adult (men & women) free of CHD at baseline (2007-2008) were selected randomly by including all racial and ethnic minority participants from Kaiser Permanente of Northern California, 51954 participated, aged >30-<74, White non-Hispanic followed for a maximum of 5.9. All participants responded to a self-administered questionnaire that included information on medical history, ancestry, health behaviors. <sup>1</sup>                                                                                                                                                        |
| 2  | The MORGAM case-cohort study of (4818) healthy men at baseline, white Caucasian were selected randomly from nine prospective European cohorts, aged 25-64 years, over a median 18 years follow up, participants used to examine the associations between CHD and risk scores based on genetic variants representing 13 genomic regions, baseline examination of this cohort took place in the year 1997. <sup>2</sup>                                                                                                                                                                                                                                                      |
| 3  | The second Northwick Park heart study (NPHSII) is cohort of 2742 white Caucasian, middle-aged men (50-64 years), recruited (2005) from nine United Kingdom general practices, questionnaire used to assess Family history of CHD. Participants with genotype data included 15 years followed for incident of CHD. <sup>3</sup>                                                                                                                                                                                                                                                                                                                                             |
| 4  | 2057 participants of the second Northwick Park heart study (NPHSII), middle-aged men (50-64 years), Caucasian men with complete trait data (and with full genotype data) included in this study, 10.8 years follow up, recruited in 2005. <sup>4</sup>                                                                                                                                                                                                                                                                                                                                                                                                                     |
| 5  | Two prospective studies compared; QRISK2 and NPHSII, the QRISK2 was used to assess CHD risk using conventional risk factors (CRFs), while Northwick Park Heart Study (NPHSII) used to assess the performance of a 19 single nucleotide polymorphism (SNP) gene score (GS) for CHD. NPHSII study included 2775 healthy UK men, aged (50-64) were recruited from nine general practices, 13.5 years' follow-up. <sup>5</sup>                                                                                                                                                                                                                                                 |
| 6  | The CoLaus study is an ongoing prospective survey investigating the biological and genetic determinants of cardiovascular disease in the population of Lausanne, Switzerland, (4283) Participants, aged 35-75 years, over median follow-up time of 5.6 years, the study relies on personal interview, physical examination and laboratory testing, the baseline investigation was conducted in 2003-2006 and a first follow-up in 2009-2012. <sup>6</sup>                                                                                                                                                                                                                  |
| 7  | Three different prospective studies were compared (ARIC, Rotterdam and Framingham Offspring). In total, 8542 of ARIC participants, aged 45-64 years, non-Hispanic whites followed for a maximum of 18 years, 2068 Rotterdam; all inhabitants of Ommoord, a district of Rotterdam in the Netherlands, aged under 65 years information from baseline (1990-1993) until January 1, 2007, and 2339 participants of Framingham Offspring Studies free of CHD at baseline and had genetic data, followed from study entry at exam 1 (1971-1975) for the first occurrence of CHD (incident CHD), data collected using questionnaire used and a clinical examination. <sup>7</sup> |

|    |                                                                                                                                                                                                                                                                                                                                                                                                          |
|----|----------------------------------------------------------------------------------------------------------------------------------------------------------------------------------------------------------------------------------------------------------------------------------------------------------------------------------------------------------------------------------------------------------|
| 8  | Chin-Shan Community Cardiovascular Cohort Study of 3568 (women & men), homogeneous recruited from Chinese ethnicity, living in the Chin-Shan township, aged $\geq 35$ years, with blood lipid data and free from CVD, 13.6 years' follow-up, the baseline investigation was conducted in 1990-2005. <sup>8</sup>                                                                                         |
| 9  | EPIC-Norfolk is a prospective cohort study in which men and women, 10295 participants, aged 40-79 years were recruited in 1993-1998 from general practices in the Norfolk region, England, 8.5 years' follow-up. <sup>9</sup>                                                                                                                                                                            |
| 10 | This study is based upon 5191 men who at enrolment, Employees were recruited between 1970 -1973 from 27 workplaces in the west of Scotland, aged 35-64, 15 years' follow-up. <sup>10</sup>                                                                                                                                                                                                               |
| 11 | A total of 5521 participants of Suita study, a Japanese urban population women and men, randomly selected, aged 30-79 years, free of CHD at baseline in 1989-2004, compared with original Framingham Score over median follow-up time of 11.8 years. <sup>11</sup>                                                                                                                                       |
| 12 | 3322 participants of The Framingham Offspring Study, residents of the city of Framingham, Massachusetts, (Men & Women), Participants who attended the fourth examination cycle (1987-1991), underwent a routine medical history, a physical examination that included blood pressure measurement and anthropometry and blood sampling were included, aged 30-74 years, 15 years follow-up. <sup>12</sup> |
| 13 | The study population was derived from the Multi-Ethnic Study of Atherosclerosis population (MESA), (4679) women and men, Caucasian, African-American, Hispanic, or Chinese-American participants, aged 45 to 84 years and free of clinically apparent CVD were recruited between 2000-2002, from (6) U.S. communities, 12.5 years' follow-up. <sup>13</sup>                                              |
| 14 | A total of 13145 participants of Atherosclerosis Risk in Communities (ARIC), cohort study from US, aged 45-64 years, Caucasian non-Hispanic whites followed for a maximum of 15.1 years, recruitment year 1987-1989, who were followed for the development of clinical CHD. <sup>14</sup>                                                                                                                |
| 15 | 3971 participants of Cardiovascular Health Study (CHS), Boston men and women, blacks & white Invited to participate, selected randomly, aged $\geq 65$ years were recruited between 1989-1990 or 1992-1993, 10 years' follow-up. <sup>15</sup>                                                                                                                                                           |
| 16 | The Second Northwick Park Heart Study (NPHS-II), 3052 participants, healthy UK men aged 50-64 years, Caucasian, followed for a median of 10.8 years for CHD events, the study compared the predictive value of the PROCAM and Framingham risk algorithms in (NPHS-II) population, recruited in 2004. <sup>16</sup>                                                                                       |
| 17 | The Normative Aging Study is a prospective study of aging established by the Veterans Administration in 1961, 1393 white males from a single geographic location (Boston, Mass), aged 30-74, 10 years' follow-up. <sup>17</sup>                                                                                                                                                                          |
| 18 | Korean Heart Study (KHS) population, 268315 participants (women & men), selected non-random, who had voluntarily undergone private health examinations in 18 centers located in the capital and six provinces in South Korea between 1996 -2004, aged 70-79 years, 11.6 years' follow-up. <sup>18</sup>                                                                                                  |
| 19 | The Dutch Cardiovascular Registry Maastricht (CAREMA) study population of Netherlands, 21148 participants (women & men), selected randomly from the Maastricht region, were recruited in 1987-1997, aged 20-59 years, 10.9 years follow-up. <sup>19</sup>                                                                                                                                                |
| 20 | A total of 5101 from Tehran Lipid and Glucose Study, a prospective population-based study conducted on a representative sample of district-13 of Tehran, (Iranian urban population men and women), aged $\geq 30$ , free of CHD at baseline, were recruited in 1999 -2001, 9.3 years' follow-up. <sup>20</sup>                                                                                           |

|    |                                                                                                                                                                                                                                                                                                                                                                                                                                                                                                                               |
|----|-------------------------------------------------------------------------------------------------------------------------------------------------------------------------------------------------------------------------------------------------------------------------------------------------------------------------------------------------------------------------------------------------------------------------------------------------------------------------------------------------------------------------------|
| 21 | Participants were part of the Health, Aging, and Body Composition Study (Health ABC Study), a population-based cohort study of 2192 community-dwelling men and women, selected randomly (white& black) aged 70-79 years recruited in 1997-1998, over median follow-up time of 8 years. <sup>21</sup>                                                                                                                                                                                                                          |
| 22 | 630 participants of active-duty US Army personnel-stationed within the National Capital Area of the Walter Reed Health Care System were included, aged 39-45 years, free of CHD, 5 years follow-up, recruited in 1998-1999. <sup>22</sup>                                                                                                                                                                                                                                                                                     |
| 23 | 25663 participants of the European Prospective Investigation into Cancer and Nutrition (EPIC)-Norfolk study, resident in Norfolk, UK, participants who completed a baseline questionnaire survey and attended a clinic visit selected randomly to participate in a nested case-control study (men & women), aged 45-79 years, recruited in 1993-1997, 6 years' follow-up. <sup>23</sup>                                                                                                                                       |
| 24 | 72982 participants of The Women's Health Initiative (WHI) study in the prospective cohort analysis: median follow-up was 12 years, free of CHD, recruitment in 1991-1993. <sup>24</sup>                                                                                                                                                                                                                                                                                                                                       |
| 25 | A total of 5899 participants of Rotterdam cohort Study, from Ommoord, a district of Rotterdam in The Netherlands, aged 55 years old or over, invited to participate. Baseline examination lasted from 1990 -1993, 12.8years Follow-up. <sup>25</sup>                                                                                                                                                                                                                                                                          |
| 26 | The ARIC study is a prospective investigation of atherosclerosis, 5533 and 7301 individuals (men and women) selected from four U.S. communities, aged 45-64 years, 3 years Follow-up prior to the baseline, recruitment (1986-1989). <sup>26</sup>                                                                                                                                                                                                                                                                            |
| 27 | The ARIC is prospective investigation of atherosclerosis its clinical sequelae, included 15792 US, aged 45-64 years, recruitment in (1986-1989), individuals were genotyped for 116 single nucleotide polymorphisms associated with CHD in multiple case-control studies, 1452 CHD cases defined as participants with either definite or probable myocardial infarction and 13,907 participants were followed for incident CHD for a median of 13 years between the baseline examination and December 31, 2001. <sup>27</sup> |
| 28 | A total of 15792 participants of the Atherosclerosis Risk in Communities (ARIC), case-control studies were included to assess the association of 19 novel risk markers with incident CHD, aged 45-64 years, sampled from four U.S. communities, in (1987-1989). <sup>28</sup>                                                                                                                                                                                                                                                 |
| 29 | A 1196 participants study (men & women) were recruited from the South Bay Heart Watch prospective study designed in 1990-1992, they were received mail letters invitation to participate in this study, subject who agreed to return for testing and be followed up for an additional 3 years included, the mean aged of the participants was 66 years, 3.5 years Follow-up. <sup>29</sup>                                                                                                                                    |
| 30 | 23595 participants of the Malmo diet and Cancer study (prospective, population-based study), a residents of Malmo, Sweden, men and women invited to participate, during a median follow-up of 14.4 years, recruitment in 1991-1996, aged 46 -73 for Men and 45-73 for women. <sup>30</sup>                                                                                                                                                                                                                                    |
| 31 | A total of 2536 male employees from the Electricity Generating Authority of Thailand were participated in this cohort study, 17 years of follow-up, aged 35-59 years at baseline were included in the study. <sup>31</sup>                                                                                                                                                                                                                                                                                                    |
| 32 | The Edinburgh Artery Study (EAS) is a prospective study from Edinburgh, Scotland, in general 840 men and women randomly selected to examine whether a panel of SNPs, systematically selected from genome-wide association studies (GWAS), could improve                                                                                                                                                                                                                                                                       |

|    |                                                                                                                                                                                                                                                                                                                                                                                                                                                                                                                                                                                                                                                                                                                                                                                                                                                                                                                                                                                                                                                                                                                             |
|----|-----------------------------------------------------------------------------------------------------------------------------------------------------------------------------------------------------------------------------------------------------------------------------------------------------------------------------------------------------------------------------------------------------------------------------------------------------------------------------------------------------------------------------------------------------------------------------------------------------------------------------------------------------------------------------------------------------------------------------------------------------------------------------------------------------------------------------------------------------------------------------------------------------------------------------------------------------------------------------------------------------------------------------------------------------------------------------------------------------------------------------|
|    | risk prediction of coronary heart disease (CHD), participants aged 54-75, 15 years of follow-up. Clinical examinations were held during 1987-1988, complete follow-up was available until June 2003. <sup>32</sup>                                                                                                                                                                                                                                                                                                                                                                                                                                                                                                                                                                                                                                                                                                                                                                                                                                                                                                          |
| 33 | 6216 participants (men and women) of the Framingham Heart Study (Massachusetts, USA) were included, All subjects were examined from 1971-1996 who were free of CHD, they stratified into age and gender-specific tertiles of Framingham risk score, and lifetime risk for CHD was estimate, aged 40-94, 10 years Follow-up. <sup>33</sup>                                                                                                                                                                                                                                                                                                                                                                                                                                                                                                                                                                                                                                                                                                                                                                                   |
| 34 | PRIME is Prospective Epidemiological Study of Myocardial Infarction, it was recruited in centers in Belfast (Northern Ireland) and Lille, Strasbourg, and Toulouse (France) and a Coordinating Centre in Paris, this study was compared with Framingham and PROCAM risk function to assess whether the Framingham and PROCAM risk functions were applicable to men in Belfast and France. In general, the PRIME study is comprised men recruited in Belfast (2399) and France (7359) who were aged 50 -59 years, free of CHD at baseline (1991-1993) and followed over 5 years for CHD events. Two validation study of the original Framingham & Framingham Offspring cohort consisted of 2489 men aged 30-74 years, who were free of any cardiovascular disease at the time of their examination from 1971-1974 within 10 years and PROCAM risk function study estimates the risk function of CHD and myocardial infraction within 10 years, it was developed from a sample of men, It consisted of 5389 men aged 35-65 years who were free of any cardiovascular disease at baseline between 1979 and 1985. <sup>34</sup> |
| 35 | 2193 Participants (men & women) of the part of the Health, Aging, and Body Composition Study (Health ABC Study) were included, a population-based cohort of community-dwelling, aged 70-79 during the study enrollment period in 1997-1998. Participants were identified from a random sample of white and all black, 8 years Follow-up. <sup>35</sup>                                                                                                                                                                                                                                                                                                                                                                                                                                                                                                                                                                                                                                                                                                                                                                      |
| 36 | A total of 9155 Participants (men & women), without diabetes selected from the Atherosclerosis Risk in Communities (ARIC), 4 US communities, participants included to investigate whether quantitative retinal vascular caliber are associated with an increased risk of incident coronary heart disease, aged 45-64 years, enrollment period in 1987-1989, a mean of 8.8 years of follow up. <sup>36</sup>                                                                                                                                                                                                                                                                                                                                                                                                                                                                                                                                                                                                                                                                                                                 |
| 37 | A total of 2259 subjects (men & women) from the Turkish middle-aged adults population (TARF study) participated in this study, the study is based on a longitudinal follow-up of survey conducted initially in 1990 in all geographic regions of Turkey, they were selected randomly, aged 35-84, during 1990-1995, 5 years of follow up. <sup>37</sup>                                                                                                                                                                                                                                                                                                                                                                                                                                                                                                                                                                                                                                                                                                                                                                     |
| 38 | Participants of Framingham cohort Studies consisted of 2489 men and 2856 women 30-74 years old at baseline with 12 years of follow-up in 1971-1974. Participants attended either the 11th examination of the original Framingham cohort or the initial examination of the Framingham Offspring Study included. <sup>38</sup>                                                                                                                                                                                                                                                                                                                                                                                                                                                                                                                                                                                                                                                                                                                                                                                                |
| 39 | Framingham risk score were calculated for participants in the ARIC cohort, 3901 men, 5406 women were participated in this study from 4 US communities, aged 45-64 years old at entry (1986-1989 through 2001),at baseline (visit 3) and (3 - 6) years before. <sup>39</sup>                                                                                                                                                                                                                                                                                                                                                                                                                                                                                                                                                                                                                                                                                                                                                                                                                                                 |
| 40 | This study is based on a cohort of 970 men who were 34-64 years of age and free of CHD, other cardiovascular disease, and diabetes while participating in the second examination of the Helsinki Policemen Study in 1971-1972, 22 years of follow up. <sup>40</sup>                                                                                                                                                                                                                                                                                                                                                                                                                                                                                                                                                                                                                                                                                                                                                                                                                                                         |
| 41 | Data from two population studies of Glostrup (n=4757) and Framingham Heart studies (n=2562) were included to examine three different level of cross validation of risk score of CHD, participants (men & women), aged 30-70, free of myocardial infraction disease, 10 years follow-up. <sup>41</sup>                                                                                                                                                                                                                                                                                                                                                                                                                                                                                                                                                                                                                                                                                                                                                                                                                       |



|    |                                                                                                                                                                                                                                                                                                                                                                                                                                                                                                                                                                                                                                        |
|----|----------------------------------------------------------------------------------------------------------------------------------------------------------------------------------------------------------------------------------------------------------------------------------------------------------------------------------------------------------------------------------------------------------------------------------------------------------------------------------------------------------------------------------------------------------------------------------------------------------------------------------------|
| 42 | The HUNT studies were carried out in the Nord-Trøndelag County in Norway in three waves, HUNT1(1984-1986), HUNT2 (1995-1997) and HUNT3 (2006-2008), participants attending HUNT2 included in a prospective nested case-control design to assess the utility of circulating microRNAs (miRs) to predict future fatal acute myocardial infarction (AMI) in healthy participants as endpoint (I21, ICD-10), 112 cases/control included In the derivation cohort and 100 apparently healthy men (n = 56) and women (n = 44) included in a separate validation cohort, with 10-year follow-up, participants aged 40-70 years. <sup>42</sup> |
| 43 | The study was embedded within the Rotterdam Study, a prospective population-based cohort of persons aged 55 years or older in the municipality of Rotterdam, the Netherlands, to assess whether newer risk markers for CHD risk prediction and stratification improve Framingham risk score (FRS) predictions, 5933 participants (men & women), recruitment in (1997-1999) and (2000 -2001), 6.8 years follow-up. <sup>43</sup>                                                                                                                                                                                                        |
| 44 | 10612 Swedish participants (men& women) of five separate sub-studies with availability of DNA and data on cardiovascular risk factors that have been conducted within the registry (SATSA, OCTO-Twin, GENDER, HARMONY and TwinGene), the study aim to compare several multilocus genetic risk score (MGRS) and CHD in 1886 -2000 &1920 -1924, aged 44-≤80 years, 4.3 years follow-up. <sup>44</sup>                                                                                                                                                                                                                                    |
| 45 | 1153 Participants of the Second Northwick Park Heart Study (NPHS-II), healthy UK men, selected randomly in nested case-control design, aged (50-61 years), who were free of myocardial infarction at recruitment in 1989, followed for a median of 7.8 years for CHD events. <sup>45</sup>                                                                                                                                                                                                                                                                                                                                             |
| 46 | 2589 Participants (men& women) of the Hisayama study, Japanese population were enrolled in this study, aged 40 years or older, in 1988-2002, 14 years follow-up. <sup>46</sup>                                                                                                                                                                                                                                                                                                                                                                                                                                                         |
| 47 | 9998 participants of Atherosclerosis Risk in Communities (ARIC), cohort study from US, Whites (men& women), subject whom the 9p21 genotype and conventional risk factor information was available included, 13.5 years' follow-up, aged 45-64, recruitment in (1987-1989). <sup>47</sup>                                                                                                                                                                                                                                                                                                                                               |
| 48 | A total of 2072 healthy Canadian men were included, free of CHD from the Québec Cardiovascular Study at entry and followed for 13 years, aged 35-64 years from 1990-1991 and in 1998, participants were contacted by mail and invited to participate in this study. <sup>48</sup>                                                                                                                                                                                                                                                                                                                                                      |
| 49 | 23918 healthy Korean men was followed until 2010 in cohort consisted of participants who had visited the Health Promotion Center at Kangbuk Samsung Hospital for a medical check-up in 2005, aged more than 30 years, followed for 5 years. <sup>49</sup>                                                                                                                                                                                                                                                                                                                                                                              |
| 50 | Two UK, Caerphilly and Speedwell population from two neighboring health centers totaling 4860 men were screened for evidence of IHD in between (1979-1983). Men were followed over 10 years and validated coronary events were recorded. <sup>50</sup>                                                                                                                                                                                                                                                                                                                                                                                 |
| 51 | Coronary Artery Risk Development in Young Adults (CARDIA) Study, were recruited in 4 U.S. cities, it is a prospective cohort study in which 571 American Black men and 791 women, aged 33-45 years, in (1985-1986), 15-year follow-up. <sup>51</sup>                                                                                                                                                                                                                                                                                                                                                                                   |
| 52 | A total of 1135 healthy men and women, aged 33-69 years, participants in the ADVANCE (Atherosclerotic Disease, Vascular Function and Genetic Epidemiology) study at Kaiser Permanente Northern California and Stanford University were selected, all participants included in this study were free of CVD at baseline and attended comprehensive baseline clinic visits in 2002-2003, 11.3-year follow-up. <sup>52</sup>                                                                                                                                                                                                               |

|    |                                                                                                                                                                                                                                                                                                                                                                                                                                                                                                                                                                                                                                                                                                                                                                                                                                                                                                                                                                                                                                     |
|----|-------------------------------------------------------------------------------------------------------------------------------------------------------------------------------------------------------------------------------------------------------------------------------------------------------------------------------------------------------------------------------------------------------------------------------------------------------------------------------------------------------------------------------------------------------------------------------------------------------------------------------------------------------------------------------------------------------------------------------------------------------------------------------------------------------------------------------------------------------------------------------------------------------------------------------------------------------------------------------------------------------------------------------------|
| 53 | Three different prospective studies were compared, Multi-Ethnic Study of Atherosclerosis (MESA), Heinz Nixdorf Recall Study (HNR) and the Dallas Heart Study (DHS). In total, 6726 of MESA participants (men& women), aged 45-84, who identified themselves as white, African-American, Hispanic, or Chinese were recruited from six U.S. communities from 2000-2002, they were free of clinical heart disease at baseline and followed for 10 years, the study validated in two independent longitudinal cohort studies included, the Heinz Nixdorf Recall Study, 3692 participants aged 45-75 years, Caucasians, participants from three neighboring cities in Germany, recruited in between the years 2000-2003. The Dallas Heart Study is a multi-ethnic, population-based probability sample of Dallas County, Texas, 1080 participants, aged 45-65, Caucasians, African Americans, and Hispanics, Participants were followed for a median of 9.3 years, the initial data collection was performed in 2000-2002. <sup>53</sup> |
| 54 | The CMCS cohort included 30 121 Chinese adults aged 35-64 years at baseline. Participants (men& women) were recruited from 11 provinces and were followed up for new CHD events from 1992-2002. Participants in the Framingham Heart Study were 5251 white US residents of Framingham, Mass, who were 30-74 years old at baseline in 1971-1974 and followed up for 12 years. <sup>54</sup>                                                                                                                                                                                                                                                                                                                                                                                                                                                                                                                                                                                                                                          |
| 55 | The Baltimore Longitudinal Study of Aging (BLSA), included 152633 participants (men& women) from two community-dwelling cohort studies in the U.S. and Europe, Caucasian, healthy, well-educated, middle- to upper-middle-class, aged 30-74, mean follow-up of 7.5 years, recruits in 1985. <sup>55</sup>                                                                                                                                                                                                                                                                                                                                                                                                                                                                                                                                                                                                                                                                                                                           |
| 56 | The TARF Study is a longitudinal population-based cohort study (Turkey), 2232 participants (men& women), 30-74 middle-aged adults free of CHD at baseline, were recruited from randomly selected communities in 2002-2003, followed over 7.6 years. <sup>56</sup>                                                                                                                                                                                                                                                                                                                                                                                                                                                                                                                                                                                                                                                                                                                                                                   |
| 57 | Two prospective studies were compared; PMRP and MESA, 1084 participants (men & women), initially CHD-free, selected randomly from Marshfield Clinic Personalized Medicine Research Project (PMRP), a population-based sample repository collected, aged 45-84, recruited in 2002-2004, 5 year follow-up and Multi-Ethnic Study of Atherosclerosis (MESA), 623 participants (men & women), aged 40-80 years old, self-identified as White, African-American, Hispanic, or Chinese, 5.4 year follow-up, All participants were free of cardiovascular disease at study entry (2000-2002). <sup>57</sup>                                                                                                                                                                                                                                                                                                                                                                                                                                |
| 58 | The Tehran Lipid and Glucose Study (TLGS) is a prospective ongoing study aimed at determining the risk factors and the study population consisted of 2568 women aged ≥30 years, free from CHD symptoms at study entry 1999-2001, for a median of 9.3years follow-up. <sup>58</sup>                                                                                                                                                                                                                                                                                                                                                                                                                                                                                                                                                                                                                                                                                                                                                  |
| 59 | A total of 5271 healthy Korean (men & women), from the third Korea National Health and Nutrition Examination Survey included in this study, aged 20-78, recruitment in in 2005, 13.7-year follow-up. <sup>59</sup>                                                                                                                                                                                                                                                                                                                                                                                                                                                                                                                                                                                                                                                                                                                                                                                                                  |
| 60 | 5533 adults (men & women), from the prospective Whitehall II cohort study, UK, were selected using a stratified, multistage probability sampling design to examine whether adding information on job strain to the Framingham model improves its predictive power in a low-risk working population, their aged 35–55, adults were ascertained in Phases 1 (1985-88), 2 (1989-90) and 3 (1991-93), who were CHD free at baseline, 11.3 year follow-up. <sup>60</sup>                                                                                                                                                                                                                                                                                                                                                                                                                                                                                                                                                                 |
| 61 | A total of 29854 men from the Aerobics Center Longitudinal Study, who received a baseline examination from 1979-2002 were included to examine the association of cardiorespiratory fitness (CRF) with risk of coronary heart disease, aged 30-74 years, 12-year follow-up. <sup>61</sup>                                                                                                                                                                                                                                                                                                                                                                                                                                                                                                                                                                                                                                                                                                                                            |

|    |                                                                                                                                                                                                                                                                                                                                                                    |
|----|--------------------------------------------------------------------------------------------------------------------------------------------------------------------------------------------------------------------------------------------------------------------------------------------------------------------------------------------------------------------|
| 62 | 4903 Participant (men & women), aged 50-70 years from of the St. Francis Heart Study, New York population, USA were included, they had no history, symptoms, or signs of ASCVD between July 1996 and March 1999, 4.3 years follow-up. <sup>62</sup>                                                                                                                |
| 63 | 18225 participants in the Health Professionals Follow-up Study, selected randomly to participate in a nested case-control study among men who were free of diagnosed cardiovascular disease at the time of blood collection, aged 40 -75 years, 6 years of follow-up between 1993 and 1995. <sup>63</sup>                                                          |
| 64 | 6606 members (men & women) of the Multi-Ethnic Study of Atherosclerosis (MESA), whites, African American, Hispanic, and Chinese participants., aged 45–84 years, 11.2 years of follow-up, recruitment in 2000- 2002. <sup>64</sup>                                                                                                                                 |
| 65 | 10 741 individuals (men & women) from 6 European cohorts were included in this stud to evaluate the association between circulating (141) metabolites and incident CHD, randomly selected to participate in case-cohort study, they had no history of myocardial infarction, stroke, heart failure, and atrial fibrillation, 9.2 years of follow-up. <sup>65</sup> |
| 66 | A total of 743 participants selected randomly from REGICOR cohort study were included, aged 35–74 years, 6.1 years of follow-up. <sup>66</sup>                                                                                                                                                                                                                     |
| 67 | 24443 participants from the MDCS (Malmö Diet and Cancer Study) in southern Sweden included to investigate whether the genetic prediction of CHD differs according to the smoking behavior, 19.4 years follow-up. <sup>67</sup>                                                                                                                                     |
| 68 | 3559 individuals (men & women) from Taiwan's 2002 Triple High Survey selected randomly 9.7 years follow-up, in 2002. <sup>68</sup>                                                                                                                                                                                                                                 |
| 69 | A total of 11242 subjects from GERA cohort study participated randomly to examine the clinical utility of two multi-locus genetic risk scores (GRSs) previously validated in Europeans, aged 30–79 years, 8.7 years of follow-up. <sup>69</sup>                                                                                                                    |
| 70 | 3203 individuals selected randomly from TARF cohort study of turkish population, 9.93 years follow-up, recruitment in 2002-2003 and 2007-2008. <sup>70</sup>                                                                                                                                                                                                       |
| 71 | 5398 participants from ARIC cohort study (Atherosclerosis Risk in Communities) were included to detect the CHD by the alterations in the serum metabolome, 30 years of follow-up, aged 45–64 years from 4 US communities, Metabolomic measured in 1997, 2010 and 2014. <sup>71</sup>                                                                               |
| 72 | 4679 participants of MESA cohort study were included, aged 45–84 years, 12.5 years of follow-up, recruitment in 2000- 2002. <sup>72</sup>                                                                                                                                                                                                                          |

**Table S3:** coronary heart diseases definitions as described in the models reviewed.

| No | Outcome definition                                                                                                                                        | Frequency |
|----|-----------------------------------------------------------------------------------------------------------------------------------------------------------|-----------|
| 1  | International Classification of Diseases, Ninth Revision, codes 410 to 414 or International Classification of Diseases, Tenth Revision, codes I22 to I25. | 16        |
| 2  | International Classification of Diseases 10th Revision (acute myocardial infarction, code I21).                                                           | 2         |

|    |                                                                                                                                                                                                                                                                                                                                                                                                                                                                                                                                                                                          |   |
|----|------------------------------------------------------------------------------------------------------------------------------------------------------------------------------------------------------------------------------------------------------------------------------------------------------------------------------------------------------------------------------------------------------------------------------------------------------------------------------------------------------------------------------------------------------------------------------------------|---|
| 3  | Hospitalization or death with any of the following primary diagnoses: acute MI and unstable angina (ICD-10: I20.0, I21, I22; ICD-9: 410, 411B; ICD-8: 410, 411 and surgical codes: FNG02, FNG05, FNC, FND, FNE).                                                                                                                                                                                                                                                                                                                                                                         | 2 |
| 4  | 'Hard' CHD events, comprising acute myocardial infarction, sudden death and other coronary deaths, non-fatal CHD events, defined according to the International Classification of Diseases 10th Revision (acute myocardial infarction, code I21).                                                                                                                                                                                                                                                                                                                                        | 3 |
| 5  | International Classification of Diseases, 9th edition (ICD-9) codes 410–414 or ICD-10 codes I20–I25 were present on the death certificate. Non-fatal CHD included first non-fatal MI or first definite angina. Non-fatal MI was defined following MONICA criteria <sup>18</sup> based on study electrocardiograms (ECGs), hospital acute ECGs and cardiac enzymes. Incident angina was defined based on clinical records and nitrate medication use, excluding cases based solely on self-reported data without clinical verification and participants with definite angina at baseline. | 2 |
| 6  | International Classification of Diseases (ICD)-9 codes consistent with non-fatal or fatal AMI (410.x), angina pectoris (411.1, 413.x), CHD (414.x), coronary revascularization procedures (CPT4 codes 33510, 33511, 33512, 33513, 33514, 33515, 33516, 33517, 33518, 33519, 33521, 33522, 33523, 33530, 33533, 33534, 33535, 33536, 92980, 92981, 92982, 92984, 92995, 92996) or CHD death (ICD-9 codes 410–414 or ICD-10 codes I20–I25).                                                                                                                                                | 1 |
| 7  | Acute myocardial infarction (MI), old (recognized and unrecognized) MI, angina pectoris, and CHD death. The International Classification of Disease (ICD-8) codes for diseases of the circulatory system                                                                                                                                                                                                                                                                                                                                                                                 | 2 |
| 8  | Acute myocardial infarction (MI), silent MI, sudden cardiac death within 1 hour after the onset of acute illness, or coronary artery disease followed by coronary artery bypass surgery or angioplasty.                                                                                                                                                                                                                                                                                                                                                                                  | 1 |
| 9  | Acute myocardial infarction (MI), silent MI or undergoing coronary surgery.                                                                                                                                                                                                                                                                                                                                                                                                                                                                                                              | 3 |
| 10 | Acute MI, coronary death, hospitalization for angina, or coronary revascularization (angioplasty of coronary arteries and coronary artery bypass graft surgery).                                                                                                                                                                                                                                                                                                                                                                                                                         | 1 |
| 11 | Myocardial infarction or coronary death, CHD death was defined as the absence of non-atherosclerotic cause of death and 1 or both of the following: chest pain within 72 hours of death or history of chronic ischemic heart disease in the absence of valvular heart disease or non-ischemic cardiomyopathy.                                                                                                                                                                                                                                                                            | 1 |
| 12 | Myocardial infarction, fatal CHD, or cardiac procedure.                                                                                                                                                                                                                                                                                                                                                                                                                                                                                                                                  | 2 |
| 13 | Sudden coronary death, fatal acute myocardial infarction, and nonfatal acute myocardial infarction.                                                                                                                                                                                                                                                                                                                                                                                                                                                                                      | 1 |
| 14 | Myocardial infarction as the presence of 2 of the following 3 factors: (1) prolonged chest pain prompting hospital admission, (2) diagnostic evolutionary ECG changes, and (3) elevation of serum creatine kinase to twice the upper limits of normal or a positive serum creatine kinase MB fraction.                                                                                                                                                                                                                                                                                   | 1 |

|    |                                                                                                                                                                                                                                                                                                                                                                                            |    |
|----|--------------------------------------------------------------------------------------------------------------------------------------------------------------------------------------------------------------------------------------------------------------------------------------------------------------------------------------------------------------------------------------------|----|
| 15 | Myocardial infarction , resuscitated cardiac arrest, definite angina (symptoms of typical chest pain and physician diagnosis of angina followed by coronary artery bypass grafting and percutaneous transluminal coronary angioplasty (PTCA), evidence of ischemia by stress tests or resting electrocardiogram, or $\geq 70\%$ obstruction on coronary angiography), and probable angina. | 1  |
| 16 | Nonfatal myocardial infarction or coronary death (corresponding to “hard” events, as defined in the current FRS, and hospitalization for angina or revascularization (coronary angioplasty or surgery).                                                                                                                                                                                    | 1  |
| 17 | Fatal or non-fatal myocardial infarction, stable or unstable angina, percutaneous coronary revascularization, or bypass grafting.                                                                                                                                                                                                                                                          | 11 |
| 18 | Fatal or non-fatal CHD event, which included definite and possible acute MI or coronary death, unstable angina pectoris, revascularization, and unclassifiable fatal events.                                                                                                                                                                                                               | 5  |
| 19 | first-ever acute myocardial infarction (MI), silent MI, sudden cardiac death within 1 hour after the onset of acute illness, or coronary artery disease followed by coronary artery bypass surgery or angioplasty.                                                                                                                                                                         | 1  |
| 20 | Definite or probable hospitalized myocardial infarction or a definite CHD death.                                                                                                                                                                                                                                                                                                           | 2  |
| 21 | Angina pectoris, coronary insufficiency, myocardial infarction, and death due to CHD.                                                                                                                                                                                                                                                                                                      | 1  |
| 22 | Definite or probable myocardial infarction, silent myocardial infarction (indicated by electrocardiogram), definite CHD death, or coronary revascularization).                                                                                                                                                                                                                             | 4  |
| 23 | Definite nonfatal or fatal myocardial infarction or death due to CHD. Definite and possible fatal CHD were coded by using the definitions applied within the Cardiovascular Health Study.                                                                                                                                                                                                  | 1  |
| 24 | Stable or unstable angina or coronary revascularization procedures (coronary bypass or percutaneous intervention), or death because of CHD, defined according to the International Classification of Diseases-Ninth Revision and International Classification of Diseases-Tenth Revision codes used in event ascertainment.                                                                | 2  |
| 25 | Recognized or unrecognized MI, angina pectoris, coronary insufficiency, or CHD death.                                                                                                                                                                                                                                                                                                      | 2  |
| 26 | IHD death, clinical non-fatal (definite acute) MI and electrocardiographic MI, as previously described. A major IHD event was defined as one or more of the three possible outcomes described above.                                                                                                                                                                                       | 1  |
| 27 | No reported                                                                                                                                                                                                                                                                                                                                                                                | 2  |

Table above described the coronary heart diseases outcomes as described by (Damen et. al, 2016)

**Table S4:** Outcome's categories of CHD used for models reviewed.

| No    | Outcome category                                                                                                                  | No | %   |
|-------|-----------------------------------------------------------------------------------------------------------------------------------|----|-----|
| 1     | CHD incident                                                                                                                      | 42 | 58  |
| 2     | Fatal and non-fatal myocardial infraction                                                                                         | 12 | 17  |
| 3     | Acute CHD events, coronary artery revascularization procedures, and silent myocardial infarctions.                                | 2  | 3   |
| 4     | Definite or probable MI's, CHD deaths, coronary revascularizations, silent [ECG-confirmed] MI's)/major or minor ECG abnormalities | 2  | 3   |
| 5     | CHD deaths, non-fatal MI, angina-driven revascularizations, resuscitated cardiac arrests                                          | 7  | 10  |
| 6     | Death of CHD                                                                                                                      | 1  | 1   |
| 7     | CHD events included cases of surgery for angina pectoris                                                                          | 2  | 3   |
| 8     | Fatal cardiovascular disease and nonfatal cardiovascular disease                                                                  | 1  | 1   |
| 9     | No reported                                                                                                                       | 3  | 4   |
| Total |                                                                                                                                   | 72 | 100 |

**Table S5:** Modelling method used to develop the prediction models.

| No    | Modelling method                             | Frequency | %   |
|-------|----------------------------------------------|-----------|-----|
| 1     | Cox proportional hazards regression/ Weibull | 47        | 65  |
| 2     | Logistic regression/ stepwise                | 17        | 24  |
| 3     | Conditional logistic regression              | 4         | 5   |
| 4     | Lifetime survival analysis                   | 2         | 3   |
| 7     | No report                                    | 2         | 3   |
| Total |                                              | 72        | 100 |

**Table S6:** Method for selection of predictors in models included

| No | Predictor's selection             | Developed | Validation | Total |
|----|-----------------------------------|-----------|------------|-------|
| 1  | Imputation                        | 5         | 1          | 6     |
| 2  | Backward approach                 | 3         | 0          | 3     |
| 3  | Forward approach                  | 2         | 1          | 3     |
| 4  | Bayes information criterion (BIC) | 6         | 3          | 9     |
| 5  | Akaike information criterion      | 2         | 3          | 5     |
| 6  | Grambsch and Therneau statistic   | 2         | 0          | 2     |

|       |                            |    |    |    |
|-------|----------------------------|----|----|----|
| 7     | Schoenfeld test            | 5  | 2  | 7  |
| 8     | Likelihood ratio test (LR) | 9  | 3  | 12 |
| 9     | Shrinkage/penalization     | 1  | 2  | 3  |
| Total |                            | 35 | 15 | 50 |

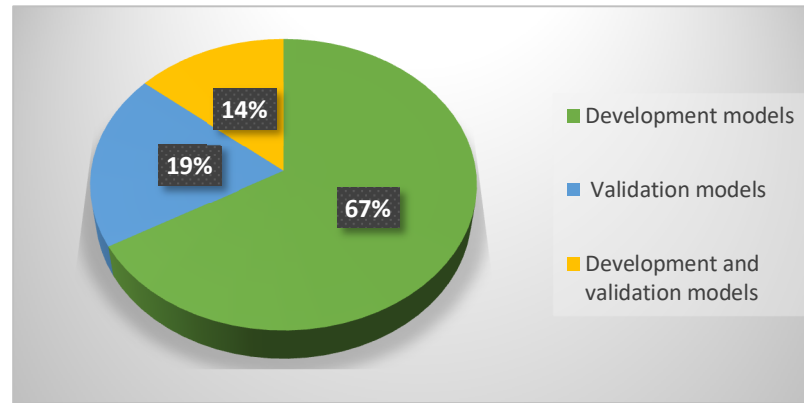

**Figure S3:** Types of Prediction Modelling Studies identified

The figure above-described types of the models included in the review; most (n=48, 67%) of the model was internal validated studies included (n=10) genetic model, (n=10) 19% is model development and validation (n=5) were genetics, while (n=14) 14% was external validation studies (n=2) were genetics.

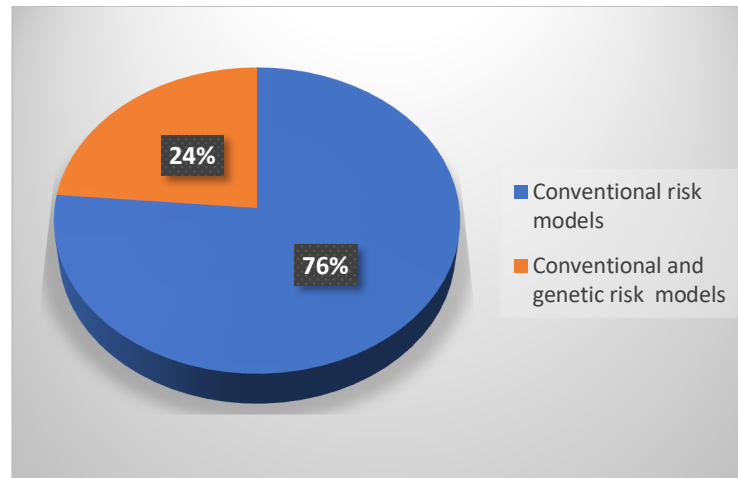

**Supplementary Figure S4:** The conventional and genetics risk models included

The conventional and genetics risk models included, (n=55, 76%) conventional risk modelling studies while (n=17, 24%) genetic models were included.

**Table S7.** SNPs included in the genetics modelling studies.

| No | SNPs' ID   | Gene       | Freq | No | SNPs' ID  | Gene               | Freq |
|----|------------|------------|------|----|-----------|--------------------|------|
| 1  | rs7412     | APOE       | 1    | 48 | rs2954029 | unknown            | 4    |
| 2  | rs429358   | APOE       | 1    | 49 | rs1333049 | unknown            | 4    |
| 3  | rs11591147 | PCSK9      | 1    | 50 | rs3217992 | CDKN2B, CDKN2B-AS1 | 4    |
| 4  | rs10757274 | CDKN2B-AS1 | 4    | 51 | rs579459  | unknown            | 4    |
| 5  | rs599839   | PSRC1      | 3    | 52 | rs2505083 | JCAD               | 5    |
| 6  | rs10455872 | LPA        | 3    | 53 | rs501120  | unknown            | 6    |
| 7  | rs17465637 | MIA3       | 4    | 54 | rs2047009 | unknown            | 4    |
| 8  | rs9818870  | MRAS       | 6    | 55 | rs2246833 | LIPA               | 3    |
| 9  | rs1746048  | unknown    | 4    | 56 | rs974819  | unknown            | 5    |
| 10 | rs328      | LPL        | 1    | 57 | rs9326246 | unknown            | 2    |
| 11 | rs7025486  | DAB2IP     | 1    | 58 | rs3184504 | SH2B3              | 7    |
| 12 | rs1801177  | LPL        | 1    | 59 | rs9319428 | FLT1               | 4    |



|    |            |                     |    |    |            |              |   |
|----|------------|---------------------|----|----|------------|--------------|---|
| 13 | rs3798220  | LPA                 | 4  | 60 | rs7173743  | unknown      | 4 |
| 14 | rs662799   | APOA5               | 1  | 61 | rs12936587 | unknown      | 5 |
| 15 | rs708272   | CETP                | 1  | 62 | rs2281727  | SMG6         | 3 |
| 16 | rs4341     | ACE                 | 1  | 63 | rs15563    | UBE2Z        | 2 |
| 17 | rs1042031  | APOB                | 1  | 64 | rs2075650  | TOMM40       | 2 |
| 18 | rs1799983  | NOS3                | 1  | 65 | rs445925   | APOC1        | 3 |
| 19 | rs17228212 | SMAD3               | 1  | 66 | rs9982601  | unknown      | 5 |
| 20 | rs7692387  | GUCY1A1             | 5  | 67 | rs10507391 | ALOX5AP      | 1 |
| 21 | rs17114036 | PLPP3               | 12 | 68 | rs17222842 | unknown      | 1 |
| 22 | rs12413409 | CNNM2               | 5  | 69 | rs9315050  | ALOX5AP      | 1 |
| 23 | rs1122608  | SMARCA4             | 7  | 70 | rs17216473 | ALOX5AP      | 1 |
| 24 | rs9515203  | COL4A2              | 5  | 71 | rs3008621  | MIA3         | 1 |
| 25 | rs9369640  | PHACTR1             | 2  | 72 | rs646776   | CELSR2       | 3 |
| 26 | rs11556924 | ZC3HC1              | 5  | 73 | rs3127599  | LPAL2        | 1 |
| 27 | rs602633   | unknown             | 3  | 74 | rs7767084  | LPA          | 1 |
| 28 | rs1412444  | LIPA                | 1  | 75 | rs10755578 | LPA          | 2 |
| 29 | rs4845625  | IL6R                | 4  | 76 | rs2259816  | HNF1A        | 3 |
| 30 | rs11206510 | unknown             | 5  | 77 | rs6922269  | MTHFD1L      | 1 |
| 31 | rs17464857 | TAF1A, TAF1A-AS     | 1  | 78 | rs3900940  | MYH15        | 2 |
| 32 | rs67258870 | DHRX                | 6  | 79 | rs1010     | VAMP8        | 2 |
| 33 | rs515135   | unknown             | 3  | 80 | rs7439293  | PALLD        | 2 |
| 34 | rs2252641  | TEX41, LOC100505498 | 3  | 81 | rs2298566  | SNX19        | 2 |
| 35 | rs1561198  | VAMP5               | 4  | 82 | rs10797416 | SKI          | 1 |
| 36 | rs6544713  | ABCG8               | 4  | 83 | rs1490738  | PKN2-AS1     | 1 |
| 37 | rs1878406  | unknown             | 3  | 84 | rs4268379  | SARS1        | 1 |
| 38 | rs273909   | SLC22A4, MIR3936HG  | 5  | 85 | rs12127701 | MYBPHL       | 1 |
| 39 | rs12190287 | TCF21               | 5  | 86 | rs7515901  | MYBPHL       | 1 |
| 40 | rs2048327  | SLC22A3             | 5  | 87 | rs11806316 | unknown      | 1 |
| 41 | rs12526453 | PHACTR1             | 5  | 88 | rs11204666 | ADAMTSL4-AS1 | 1 |
| 42 | rs10947789 | KCNK5               | 4  | 89 | rs12125501 | NME7         | 1 |
| 43 | rs4252120  | PLG                 | 5  | 90 | rs6700559  | DDX59-AS1    | 1 |
| 44 | rs12205331 | ANKS1A              | 2  | 91 | rs2292096  | CAMSAP2      | 1 |
| 45 | rs2023938  | HDAC9               | 4  | 92 | rs2820315  | LMOD1        | 1 |

|     |            |                           |   |     |            |                    |   |
|-----|------------|---------------------------|---|-----|------------|--------------------|---|
| 46  | rs12539895 | COG5                      | 1 | 93  | rs16986953 | unknown            | 1 |
| 47  | rs264      | LPL                       | 3 | 94  | rs7561273  | MFSD2B             | 1 |
| 95  | rs10495907 | unknown                   | 1 | 144 | rs7074064  | BMPRI1A            | 1 |
| 96  | rs816889   | RND3                      | 1 | 145 | rs11203042 | LIPA               | 1 |
| 97  | rs2351524  | NBEAL1                    | 1 | 146 | rs11191447 | AS3MT, BORCS7-ASMT | 1 |
| 98  | rs2571445  | TNS1                      | 1 | 147 | rs12765878 | STN1               | 1 |
| 99  | rs4566357  | COL4A4                    | 1 | 148 | rs93139    | SWAP70             | 1 |
| 100 | rs11718455 | unknown                   | 1 | 149 | rs7116641  | HSD17B12           | 1 |
| 101 | rs11710224 | LRRC2                     | 1 | 150 | rs12801636 | PCNX3              | 1 |
| 102 | rs7642590  | MAP4                      | 1 | 151 | rs590121   | SERPINH1           | 1 |
| 103 | rs11916151 | unknown                   | 1 | 152 | rs606452   | SERPINH1           | 1 |
| 104 | rs1393786  | PPP2R3A                   | 1 | 153 | rs683800   | DCPS               | 1 |
| 105 | rs2306374  | MRAS                      | 2 | 154 | rs4762911  | unknown            | 1 |
| 106 | rs4301033  | LINC01214,<br>LOC10798641 | 1 | 155 | rs4149033  | SLCO1B1            | 1 |
| 107 | rs17655141 | unknown                   | 1 | 156 | rs2681472  | ATP2B1             | 1 |
| 108 | rs17083481 | unknown                   | 1 | 157 | rs6490029  | CUX2               | 1 |
| 109 | rs17087335 | NOA1                      | 1 | 158 | rs3809274  | unknown            | 1 |
| 110 | rs7356185  | USP53                     | 1 | 159 | rs17630235 | TRAFD1             | 1 |
| 111 | rs1429141  | unknown                   | 1 | 160 | rs2891403  | RPH3A              | 1 |
| 112 | rs4469055  | unknown                   | 1 | 161 | rs2244608  | HNF1A              | 1 |
| 113 | rs6841581  | EDNRA                     | 1 | 162 | rs11057841 | SCARB1             | 1 |
| 114 | rs4690974  | unknown                   | 1 | 163 | rs9316753  | unknown            | 1 |
| 115 | rs2736100  | TERT                      | 1 | 164 | rs10507753 | unknown            | 1 |
| 116 | rs10051876 | unknown                   | 1 | 165 | rs11617955 | COL4A1             | 1 |
| 117 | rs246600   | ARHGAP26                  | 1 | 166 | rs7139492  | COL4A1             | 1 |
| 118 | rs2294461  | LY86, LY86-AS1            | 1 | 167 | rs12873154 | COL4A1             | 1 |
| 119 | rs9472428  | PHACTR1,<br>LOC107984015  | 1 | 168 | rs4773144  | COL4A1, COL4A2     | 3 |
| 120 | rs883947   | PHACTR1                   | 1 | 169 | rs11619057 | COL4A2             | 1 |
| 121 | rs13211739 | PHACTR1                   | 1 | 170 | rs9515201  | COL4A2             | 1 |
| 122 | rs1321309  | unknown                   | 1 | 171 | rs2895811  | HHIPL1             | 4 |
| 123 | rs3778448  | KCNK5                     | 1 | 172 | rs2146238  | CYP46A1            | 1 |

|     |            |                          |   |     |            |                           |   |
|-----|------------|--------------------------|---|-----|------------|---------------------------|---|
| 124 | rs4613862  | LINC02542                | 1 | 173 | rs6494488  | LOC107984737              | 1 |
| 125 | rs17062853 | TARID                    | 1 | 174 | rs2487928  | JCAD                      | 1 |
| 126 | rs12663498 | PLEKHG1                  | 1 | 175 | rs11072794 | LOC105370913,LOC112268142 | 1 |
| 127 | rs6926458  | LPA                      | 1 | 176 | rs7181240  | unknown                   | 1 |
| 128 | rs1247351  | LOC102724087             | 1 | 177 | rs2880765  | AKAP13                    | 1 |
| 129 | rs972158   | SNX10                    | 1 | 178 | rs17514846 | FURIN                     | 3 |
| 130 | rs217      | JAZF1                    | 1 | 179 | rs2521501  | FES                       | 1 |
| 131 | rs1167800  | HIP1                     | 1 | 180 | rs7496815  | unknown                   | 1 |
| 132 | rs2395858  | COG5                     | 1 | 181 | rs4299203  | DRC3                      | 1 |
| 133 | rs4591971  | unknown                  | 1 | 182 | rs2071167  | UBT, LOC101926967         | 1 |
| 134 | rs10237377 | PARP12                   | 1 | 183 | rs16948048 | ZNF652, LOC102724596      | 1 |
| 135 | rs6984210  | BMP1                     | 1 | 184 | rs4793721  | CA10                      | 1 |
| 136 | rs17485781 | NUGGC                    | 1 | 185 | rs2070783  | PECAM1                    | 1 |
| 137 | rs10962774 | unknown                  | 1 | 186 | rs4410190  | unknown                   | 1 |
| 138 | rs16905599 | CDKN2B-AS1               | 1 | 187 | rs892115   | SPC24                     | 1 |
| 139 | rs10965228 | CDKN2B-AS1               | 1 | 188 | rs17318596 | DMAC2                     | 1 |
| 140 | rs495828   | unknown                  | 1 | 189 | rs2288911  | APOC2, APOC4-APOC2        | 1 |
| 141 | rs11238956 | unknown                  | 1 | 190 | rs8111989  | CKM                       | 1 |
| 142 | rs17155842 | unknown                  | 1 | 191 | rs6088638  | ACSS2                     | 1 |
| 143 | rs3748242  | ANXA11                   | 1 | 192 | rs867186   | PROCR, MMP24-AS1-EDEM2    | 1 |
| 193 | rs2832227  | MAP3K7CL                 | 1 | 212 | rs4994     | ADRB3                     | 1 |
| 194 | rs1034565  | ARVCF                    | 1 | 213 | rs12102203 | DMXL2                     | 1 |
| 195 | rs9608859  | unknown                  | 1 | 214 | rs1122955  | ZNF132                    | 1 |
| 196 | rs17609940 | ANKS1A                   | 2 | 215 | rs1799963  | F2                        | 1 |
| 197 | rs10953541 | BCAP29, DUS4L-<br>BCAP29 | 2 | 216 | rs2961135  | OR2A25, LOC105375548      | 1 |
| 198 | rs964184   | ZPR1                     | 1 | 217 | rs89962    | KRT5                      | 1 |
| 199 | rs10757274 | CDKN2B-AS1               | 1 | 218 | rs10822891 | CTNNA3                    | 1 |
| 200 | rs2383206  | CDKN2B-AS1               | 1 | 219 | rs4796603  | HAP1                      | 1 |
| 201 | rs17011666 | MIA3                     | 1 | 220 | rs1800437  | GIPR                      | 1 |
| 202 | rs3825807  | ADAMTS7                  | 2 | 221 | rs3749817  | FSTL4                     | 1 |
| 203 | rs4380028  | unknown                  | 1 | 222 | rs8089     | THBS2, LOC101929523       | 1 |
| 204 | rs2228671  | LDLR                     | 1 | 223 | rs4977574  | CDKN2B-AS1                | 1 |

|     |            |                    |   |     |            |                     |   |
|-----|------------|--------------------|---|-----|------------|---------------------|---|
| 205 | rs7278204  | unknown            | 1 | 224 | rs216172   | SMG6                | 1 |
| 206 | rs20455    | KIF6, LOC107986594 | 2 | 225 | rs46522    | UBE2Z               | 1 |
| 207 | rs11016076 | MKI67              | 1 | 226 | rs318090   | UBE2Z               | 1 |
| 208 | rs2213948  | unknown            | 1 | 227 | rs2028900  | MAT2A, PARTICL      | 1 |
| 209 | rs2296436  | HPS1               | 1 | 228 | rs4299376  | ABCG8, LOC102725159 | 1 |
| 210 | rs428785   | ADAMTS1            | 1 | 229 | rs11984041 | HDAC9               | 1 |
| 211 | rs402007   | ADAMTS1            | 1 | 212 | rs4994     | ADRB3               | 1 |

**Table S8.** PICOTS elements of the articles reviewed.

| No | Authors                | Countries   | Population<br>(Free from<br>CHD) | Sample                     | Intervention<br>and<br>Comparator                             | Outcome<br>(Incident of<br>CHD)    | Times<br>Follow-Up   | Study Design |
|----|------------------------|-------------|----------------------------------|----------------------------|---------------------------------------------------------------|------------------------------------|----------------------|--------------|
| 1  | Iribarren et al., 2016 | Spain       | GERA, white non-Hispanic         | 51,954                     | GRS + CRFs and CRFs                                           | 1864; 1077 male/<br>787 female     | 5.9                  | Cohort       |
| 2  | Hughes et al., 2012    | UK          | MORGAM, Caucasian                | 4818                       | GRS + CRFs and CRFs                                           | 1736; 632 cases,<br>1361 non-cases | 18                   | Case-cohort  |
| 3  | Talmud et al., 2008    | UK          | NPHSII, Caucasian                | 2742 Male                  | GRS + CRFs and CRFs                                           | 270 male                           | 15                   | Cohort       |
| 4  | Humphries et al., 2006 | UK          | NPHSII, Caucasian                | 2057 Male                  | GRS + CRFs and CRFs                                           | 183 male                           | 10.8                 | Cohort       |
| 5  | Beaney et al., 2017    | UK          | NPHSII, Caucasian                | 2075 Male                  | GRS + CRFs and CRFs                                           | 284 male                           | 13.5                 | Cohort       |
| 6  | Antiochos et al., 2016 | Switzerland | Colaus, Caucasian                | 4283                       | GRS + CRFs and CRFs                                           |                                    | 5.6                  | Cohort       |
| 7  | Brautbar et al., 2012  | USA         | Non-Hispanic white               | 1.8542<br>2.2068<br>3.2339 | GRS + CRFs and CRFs in 1.<br>ARIC, 2.<br>Rotterdam, 3.<br>FRS | 1.1110<br>2.2068<br>3.2339         | 1.18<br>2.10<br>3.10 | Cohort       |
| 8  | Chien et al., 2007     | China       | Chin-Shan                        | 3568                       | Derived, CRF-based                                            | 122 (79 male/<br>43 female)        | 13.6                 | Cohort       |

|    |                        |             |                           |           |                              |                                                                             |      |        |
|----|------------------------|-------------|---------------------------|-----------|------------------------------|-----------------------------------------------------------------------------|------|--------|
| 9  | Simmons et al., 2008   | UK          | Norfolk                   | 10,295    | Derived, CRF-based           | 430 male, 250 female                                                        | 8.5  | Cohort |
| 10 | Macleod et al., 2006   | UK          | Scottish men              | 5191      | Derived, CRF-based           | 203 deaths, 200 hospitalized                                                | 15   | Cohort |
| 11 | Nishimura et al., 2014 | Japan       | Japanese urban (Suita)    | 5521      | Derived, CRF-based           | 213                                                                         | 11.8 | Cohort |
| 12 | Ingelsson et al., 2007 | Boston      | Framingham, Massachusetts | 3322      | Derived, CRF-based           | 291, 198 male                                                               | 15   | Cohort |
| 13 | Cao et al., 2017       | USA         | MESA                      | 4679      | Derived, CRF-based           | 150 MI, 24 resuscitated cardiac arrest, 70 deaths, and 132 definite anginas | 12.5 | Cohort |
| 14 | Nambi et al., 2009     | Houston     | ARIC                      | 13145     | Derived, CRF-based           | 1812                                                                        | 15.1 | Cohort |
| 15 | Cushman et al., 2005   | Boston      | CHD                       | 3971      | Derived, CRF-based           | 547 MI or deaths                                                            | 10   | Cohort |
| 16 | Cooper et al., 2005    | UK          | NPHSII, Caucasian         | 3052 Male | Derived, CRF-based on PROCAM | 110 male (PROCAM), and 109 male (Framingham)                                | 10.8 | Cohort |
| 17 | Orford et al., 2002    | Boston      | Normative aging study     | 1393      | Derived, CRF-based           | 206 CHD                                                                     | 10   | Cohort |
| 18 | Jee et al., 2014       | Korea       | Korean Heart Study        | 268,315   | Derived, CRFs (Framingham)   | 2596 (1903 nonfatal, 693 fatal)                                             | 11.6 | Cohort |
| 19 | Merry et al., 2011     | Netherlands | Dutch CAREMA              | 21,148    | Derived, CRFs (SCORE)        | 783                                                                         | 10.9 | Cohort |
| 20 | Khalili et al., 2011   | Iran        | Urban                     | 5101      | Derived, CRFs                | 387 (169 Female)                                                            | 9.3  | Cohort |
| 21 | Auer et al., 2012      | Switzerland | Health ABC study          | 2192      | Derived, CRFs Framingham     | 351 (96 CHD, 101 MIs, 154 anginas)                                          | 8    | Cohort |

|    |                         |             |                                  |                  |                                          |                                        |      |                     |
|----|-------------------------|-------------|----------------------------------|------------------|------------------------------------------|----------------------------------------|------|---------------------|
| 22 | Taylor et al., 2001     | USA         | US Army                          | 630              | Derived, CRFs Framingham                 | No information                         | 5    | Cohort              |
| 23 | Rana et al., 2009       | UK          | EPIC Norfolk                     | 25,663           | Derived, CRFs                            | No information                         | 6    | Nested case-control |
| 24 | Parikh et al., 2016     | USA         | Women's health initiative        | 27,982           | Derived, CRFs                            | 4607                                   | 12   | Cohort              |
| 25 | De Vries et al., 2015   | Netherlands | Rotterdam, Ommoord               | 5899             | GRS + CRFs and CRFs                      | 904 (460 MIs)                          | 10   | Cohort              |
| 26 | Paynter et al., 2011    | Boston      | ARIC                             | 12,834           | Derived, CRFs                            | No information                         | 3    | Cohort              |
| 27 | Morrison et al., 2007   | Houston     | ARIC                             | 15,792           | GRS + CRFs and CRFs                      | 1452                                   | 13   | Cohort              |
| 28 | Folsom et al., 2007     | USA         | ARIC                             | 15,792           | Derived, CRFs                            | No information                         | 5    | Nested case-control |
| 29 | Detrano et al., 1999    | USA         | South Bay Heart                  | 1196             | Derived, CRFs                            | 17 deaths and 29 nonfatal MIs, 4 fatal | 3.5  | Cohort              |
| 30 | Tada et al., 2016       | Sweden      | Malmo diet and cancer            | 23,595           | GRS + CRFs and CRFs                      | 2213                                   | 14.4 | Cohort              |
| 31 | Aekplakorn et al., 2007 | Thailand    | Electricity employees            | 2536             | Derived, CRFs                            | 66                                     | 17   | Cohort              |
| 32 | Bolton et al., 2013     | Scotland    | Edinburgh artery study           | 840              | GRS + CRFs and CRFs                      | 319                                    | 15   | Cohort              |
| 33 | Lloyd et al., 2004      | USA         | Framingham                       | 6216             | Derived, CRFs                            | 93 CHD and 1363 died free of CHD.      | 10   | Cohort              |
| 34 | Empana et al., 2003     | France      | PRIME, Men (Belfast, and France) | 1,2399<br>2,7359 | CRFs (Framingham, and PROCAM)            |                                        | 5    | Cohort              |
| 35 | Rodondi et al., 2012    | USA         | Health ABC study                 | 2193             | CRFs (Framingham older and recalibrated) | 351                                    | 8    | Cohort              |

|    |                        |             |                                   |        |                      |                                                              |      |                     |
|----|------------------------|-------------|-----------------------------------|--------|----------------------|--------------------------------------------------------------|------|---------------------|
| 36 | McGeechan et al., 2008 | USA         | ARIC                              | 9155   | Derived, CRFs        | 700                                                          | 8.8  | Cohort              |
| 37 | Onat et al., 1997      | Turkey      | TARF study                        | 2259   | Derived, CRFs        | 55 deaths, 69 nonfatal coronaries                            | 5    | Cohort              |
| 38 | Wilson et al., 1998    | USA         | Framingham                        | 5345   | Derived, CRFs        | 383 men and 227 women                                        | 12   | Cohort              |
| 39 | Mainous et al., 2008   | USA         | ARIC                              | 9307   | Derived, CRFs        | 299 men and 131 women                                        | 6    | Cohort              |
| 40 | Pyorala et al., 1998   | Finland     | Helsinki policemen                | 970    | Derived, CRFs        | 164 men, major CHD event                                     | 22   | Cohort              |
| 41 | Hiram et al., 1994     | USA         | Angiographically controlled study | 848    | GRS + CRFs and CRFs  | No information                                               | 3.2  | Cohort              |
| 42 | Bye et al., 2016       | Norway      | HUNT studies                      | 212    | miRS + CRFs and CRFs | No information                                               | 10   | Nested case-control |
| 43 | Kavousi et al., 2012   | Netherlands | Rotterdam                         | 5933   | Derived, CRFs        | 347: (190 nonfatal MIs, and 157 CHD deaths)                  | 6.8  | Cohort              |
| 44 | Ganna et al., 2013     | Sweden      | Swedish                           | 10,612 | GRS + CRFs and CRFs  | 781                                                          | 4.3  | Cohort              |
| 45 | Cooper et al., 2000    | UK          | NPHS-II                           | 928    | Derived, CRFs        | 104: (71 acute CHD events, 15 anginas, 18 new major Q waves) | 7.8  | Nested case-control |
| 46 | Arima et al., 2007     | Japan       | Japanese                          | 2589   | Derived, CRFs        | 129                                                          | 14   | Cohort              |
| 47 | Brautbar et al., 2009  | USA         | ARIC                              | 9998   | 9p21 + CRFs and CRFs | 1349                                                         | 13.5 | Cohort              |
| 48 | St-Pierre et al., 2006 | Canada      | Quebec cardiovascular study men   | 2072   | Derived, CRFs        | 230 deaths or nonfatal MIs                                   | 13   | Cohort              |

|    |                         |        |                                         |                            |               |                                                  |                           |             |
|----|-------------------------|--------|-----------------------------------------|----------------------------|---------------|--------------------------------------------------|---------------------------|-------------|
| 49 | Ryoo et al., 2016       | Korea  | Korean men                              | 23,918                     | Derived, CRFs | 5763                                             | 5                         | Cohort      |
| 50 | Yarnell et al., 2004    | UK     | Caerphilly collaborative study          | 4860                       | Derived, CRFs | 525                                              | 10                        | Cohort      |
| 51 | Everage et al., 2009    | USA    | CARDIA                                  | 1362                       | Derived, CRFs | No information.                                  | 15                        | Cohort      |
| 52 | Iribarren et al., 2015  | USA    | ADVANCE                                 | 1135                       | Derived, CRFs | 164                                              | 11.3                      | Cohort      |
| 53 | McClelland et al., 2015 | USA    | 1. MESA<br>2. Heinz<br>3. Dallas        | 1.6726<br>2.3692<br>3.1080 | Derived, CRFs | 1.422<br>2.274<br>3.58                           | 1.10.2<br>2.10.4<br>3.9.3 | Cohort      |
| 54 | Liu et al., 2004        | China  | 1. CMCS<br>2. Framingham                | 1.30121<br>2.5251          | Derived, CRFs | 1.192, and 273<br>Hard 2.625,<br>and 293 deaths. | 12                        | Cohort      |
| 55 | Brant et al., 2010      | USA    | 1. USA (BLSA)<br>2. Europe (VHD and PP) | 1.1966<br>2.150667         | Derived, CRFs | 2457                                             | 7.5                       | Cohort      |
| 56 | Onat et al., 2010       | Turkey | Turkish                                 | 2232                       | Derived, CRFs | 302                                              | 7.6                       | Case-cohort |
| 57 | Cross et al., 2012      | USA    | 1. CHDRA<br>2. MESA                     | 1.1084<br>2.6814           | Derived, CRFs | 179                                              | 5, and 5                  | Case-cohort |
| 58 | Hadaegh et al., 2012    | Iran   | Tehran lipid and glucose study          | 2568                       | Derived, CRFs | 127                                              | 9.3                       | Cohort      |
| 59 | Kang et al., 2012       | Korea  | 3rd Korea National Survey               | 5271                       | Derived, CRFs | 100                                              | 13.7                      | Cohort      |
| 60 | Kivimaki et al., 2011   | UK     | Whitehall                               | 5533                       | Derived, CRFs | 160 deaths and nonfatal MIs                      | 11.3                      | Cohort      |
| 61 | Gander et al., 2015     | USA    | Aerobic centre                          | 29,854                     | Derived, CRFs | 499                                              | 12                        | Cohort      |
| 62 | Arad et al., 2004       | USA    | Francis heart study                     | 4613                       | Derived, CRFs | 119                                              | 4.3                       | Cohort      |



|    |                        |         |                            |        |                     |                   |      |                     |
|----|------------------------|---------|----------------------------|--------|---------------------|-------------------|------|---------------------|
| 63 | Pischon et al., 2005   | USA     | Health professionals study | 18,225 | Derived, CRFs       | 266               | 6    | Nested case-control |
| 64 | Polak et al., 2015     | USA     | MESA                       | 6606   | Derived, CRFs       | 484: (209) angina | 11.2 | Cohort              |
| 65 | Cavus et al., 2019     | Germany | BiomarCaRE                 | 10,741 | Derived, CRFs       | 2166              | 9.2  | Case-cohort         |
| 66 | Subirana et al., 2018  | Spain   | REGICOR                    | 638    | Derived, CRFs       | 105               | 6.1  | Case-cohort         |
| 67 | Hindy et al., 2018     | Sweden  | Malmo iet and Cancer Study | 24,443 | GRS + CRFs and CRFs | 3217              | 19.4 | Cohort              |
| 68 | Chien et al., 2018     | Taiwan  | Taiwanese                  | 3559   | Derived, CRFs       | 63                | 9.7  | Cohort              |
| 69 | Iribarren et al., 2018 | USA     | GERA                       | 11,242 | Derived, CRFs       | 450               | 8.7  | Meta-analysis.      |
| 70 | Gunayca et al., 2019   | Turkey  | TARF                       | 3203   | Derived, CRFs       | 573               | 9.93 | Cohort              |
| 71 | Wang et al., 2019      | USA     | ARIC                       | 5398   | Derived, CRFs       | 633               | 30   | Cohort              |
| 72 | Cao et al., 2018       | USA     | MESA                       | 4623   | Derived, CRFs       | 315               | 12   | Cohort              |

MI: Myocardial infarctions, GRS: genetic risk score, CRFs: conventional risk factors, GRS: genetic risk score, CRFs: conventional risk factors, NPHS-II: the second Northwick Park heart study.

**Table S9.** Discrimination, calibration, and risk classification as described in the reviewed models.

| No * | Authors                | Predictors<br>(Genetics and Biomarkers)   | Improvement of the Model's Performance                                                                                                |                                                    |                                                             |
|------|------------------------|-------------------------------------------|---------------------------------------------------------------------------------------------------------------------------------------|----------------------------------------------------|-------------------------------------------------------------|
|      |                        |                                           | Discrimination                                                                                                                        | Calibration<br>(Goodness-of-Fit Test)              | Risk Classification                                         |
| 1    | Iribarren et al., 2016 | FRS + 4 constructed GRSs; (GRS_8, GRS_12, | $\Delta$ C-statistic: 1. GRS_8b = (0.008), 2. GRS_36 = (0.008), 3. GRS_12 = (0.007), 4. GRS_51 = (0.009), $p$ = <0.001 for all models | Hosmer–Lemeshow chi-square >0.20 in all GRS models | NRI: (5%) GRS_8 and GRS_12 and GRS_36, and (4%) for GRS_51. |

|   |                                  |                                                                                                                             |                                                                                                                                                                                |                                                                                                                |                                                                                                                                                  |
|---|----------------------------------|-----------------------------------------------------------------------------------------------------------------------------|--------------------------------------------------------------------------------------------------------------------------------------------------------------------------------|----------------------------------------------------------------------------------------------------------------|--------------------------------------------------------------------------------------------------------------------------------------------------|
|   |                                  | GRS_36, and<br>GRS_51) plus                                                                                                 |                                                                                                                                                                                |                                                                                                                |                                                                                                                                                  |
| 2 | Hughes<br>et al.,<br>2012        | 2 GRS constructed;<br>(GRS1) combined<br>11 SNPs + 2<br>haplotypes + FRS,<br>GRS2 combined 11<br>SNPs plus 4 SNPs<br>+ FRS. | Yes, marginally, only in GRS2,<br>C index improvement 1.11%, $p$<br>= 0.048, no significant<br>discrimination improvement<br>for GRS1 0.752, $p$ = 0.11.                       | -                                                                                                              | Yes (both score) NRI<br>= 7.5%, $p$ = 0.017 for<br>GRS1, 6.5%, $p$ = 0.044<br>for GRS2                                                           |
| 3 | Talmud<br>et al.,<br>2008        | 9p21.3 (rs10757274<br>+ 10 models SNPs)<br>+ CRFs                                                                           | Yes, partially, AUC (rs10757274<br>+ CRFs) = 0.64, $p$ = 0.14. AUC<br>for (CRFs + 10 models SNPs);<br>addition of 1 SNP, $p$ < 0.03,<br>addition of 2 or more; $p$ <<br>0.001. | Hosmer–<br>Lemeshow                                                                                            | Yes (event group to<br>moderate risk 13.5%<br>and 3.3%)                                                                                          |
| 4 | Humphr<br>ies et al.,<br>2006    | 12 genes + CRFs                                                                                                             | Yes, AUC = 0.62, (0.58–0.66)<br>[12.6% detection rate for a 5%<br>false-positive rate (DR5)] ( $p$ =<br>0.001).                                                                | likelihood ratio                                                                                               | -                                                                                                                                                |
| 5 | Beane<br>y et al.,<br>2017       | GRS constructed;<br>19 SNP + QRISK2<br>compared to<br>QRISK2 alone and<br>21 SNPs + QRISK2                                  | Yes, partially, 19 SNPs (AUC) =<br>(0.68 vs. 0.70 $p$ = 0.02), and 21<br>SNPs with no significant<br>improvement in discrimination<br>( $p$ = 0.55)                            | 1. 19 SNPs had<br>good calibration ( $p$<br>= 0.17), and 21<br>SNPs were poorly<br>calibrated ( $p$ =<br>0.03) | Yes; 19 SNPs, the NRI<br>= (0.07, $p$ = 0.04),<br>QRISK alone = (0.17),<br>21 SNPs<br>no improvement in<br>net reclassification ( $p$<br>= 0.10) |
| 6 | Antioch<br>os<br>et al.,<br>2016 | Parental history<br>(PH) + GRS<br>(153SNPs) + CRFs                                                                          | Yes, (GRS + CRFs); C index<br>improvement = 0.016, $p$ = 0.048.<br>GRS + CRFs + PH; C index<br>improvement = 0.022, $p$ = 0.006.                                               | Hosmer–<br>Lemeshow, 0.35 < $p$<br>< 0.94                                                                      | Yes, NRI was<br>significant, IDI was<br>significant                                                                                              |
| 7 | Brautbar<br>et al.,<br>2012      | GRS (13SNPs) +<br>CRFs in 3 groups                                                                                          | Yes, (CRFs + GRS); AUC<br>Unweighted GRS: 1. ARIC:<br>(0.742–0.749), 2. Rotterdam:<br>(0.729–0.734), 3. Framingham:                                                            | Grønnesby–Borgan<br>for derived and<br>based 1. ARIC:                                                          | NRI:<br>Unweighted GRS:<br>1. ARIC: 6.3%,<br>2. Rotterdam: 0.2%,                                                                                 |

|    |                        |                                          |                                                                                                                                      |                                                                                                     |                                                                                           |
|----|------------------------|------------------------------------------|--------------------------------------------------------------------------------------------------------------------------------------|-----------------------------------------------------------------------------------------------------|-------------------------------------------------------------------------------------------|
|    |                        |                                          | (0.773–0.775). Weighted GRS: 1. (p-value (= 0.05), ARIC: (0.742 to 0.751), 2. Rotterdam: (0.729–0.735), 3. Framingham: (0.773–0.784) | 1. (p-value (= 0.05), and (0.003). 2. Rotterdam: $p > 0.4$ for both. Rotterdam: $p > 0.4$ for both. | 3. Framingham: –0.6% Weighted GRS: 1. ARIC: 7.3%, 2. Rotterdam: 3.6%, 3. Framingham: 4.5% |
| 8  | Chien et al., 2007     | CRFs + (ApoB, non-HDL, LDL)              | Yes, AUC (ApoB = 0.63)                                                                                                               | Hosmer–Lemeshow                                                                                     | -                                                                                         |
| 9  | Simmons et al., 2008   | CRFs + glycated hemoglobin               | Yes, AUC for CRF-based = 0.72 for males, 0.80 for females. AUC new model = 0.73 and 0.80.                                            | -                                                                                                   | NRI was 3.4% male and 2.2 % female                                                        |
| 10 | Macleod et al., 2006   | CRFs + psychosocial risk factors         | Yes, AUC: 1 = 0.754, 2 = 0.745, 3 = 0.746, 4 = 0.746, 5 = 0.749                                                                      | -                                                                                                   | Recalibration coefficient based upon 20 iterations                                        |
| 11 | Nishimura et al., 2014 | CRFs + TC, LDL + Suita with/without CKD  | ROC for LDL Suita + CKD = (0.831), TC Suita + CKD = (0.835), Suita with/without CKD = (0.833 and 0.835)                              | Bayesian information criteria (BIC) and likelihood ratio.                                           | NRI and IDI: markedly for TC (Suita) + CKD, NRI for TC Suita + CKD (46.8%, $p < 0.001$ )  |
| 12 | Ingelsso et al., 2007  | CRFs + lipids (TC, LDL, HDL, ApoA, ApoB) | No, C index of ApoA, ApoB model in both men and women (0.74, 0.76), $p > 0.70$                                                       | Likelihood ratio                                                                                    | Was not statistically significant                                                         |
| 13 | Cao et al., 2017       | CRFs + ApoB                              | -                                                                                                                                    | -                                                                                                   | -                                                                                         |
| 14 | Nambi et al., 2009     | CRFs + C-IMT + Plaque                    | Yes, AUC; CRFs = (0.674), others (0.690, and 0.686) in men, AUC = (0.759 to 0.762 and 0.770) women.                                  | Grønnesby–Borgan, CRFs. Partially good fits in women                                                | NRI, clinical NRI, CRFs + CIMT + Plaque model was better                                  |
| 15 | Cushman et al., 2005   | CRFs + CRP + CIMT                        | -                                                                                                                                    | -                                                                                                   | -                                                                                         |

|    |                      |                                                                    |                                                                                                                                                             |                                                                                                                          |                                                                                                          |
|----|----------------------|--------------------------------------------------------------------|-------------------------------------------------------------------------------------------------------------------------------------------------------------|--------------------------------------------------------------------------------------------------------------------------|----------------------------------------------------------------------------------------------------------|
| 16 | Cooper et al., 2005  | CRFs + LDL, HDL (PROCAM, and FRS)                                  | ROC = 0.6295 (PROCAM) and 0.6184 (FRS)                                                                                                                      | Hosmer–Lemeshow, 0.46 (PROCAM), and 0.47 (FRS) $p < 0.0001$ for both                                                     | -                                                                                                        |
| 17 | Orford et al., 2002  | CRFs (Framingham, and European)                                    | C-statistic: 1. FRS (0.60), 2. EUR(0.58),                                                                                                                   | -                                                                                                                        | -                                                                                                        |
| 18 | Jee et al., 2014     | CRFs + LDL, HDL, TG (3 models)                                     | AUC:<br>1. Male: (0.764, 0.758, and 0.757)<br>2. Female: (0.812, 0.809, and 0.815).                                                                         | Hosmer–Lemeshow                                                                                                          | NRI = (0.284, 0.185, and 0.109) in male, and (0.177, 0.160, and 0.207) in female.                        |
| 19 | Merry et al., 2011   | CRFs (re-estimated SCORE) + Other factors (total, HDL) in 9 models | AUC: CAREMA (0.802), re-estimated SCORE high and low (0.789).                                                                                               | Calibration slope and intercept: CAREMA (1.00, 0.07%), re-estimated SCORE high and low (2.32, 3.29%), and (4.63, 4.19%). | NRI: CAREMA (28%), re-estimated SCORE high and low (28%), and (35%) respectively.                        |
| 20 | Khalili et al., 2011 | CRFs + Psychosocial risk factors (Rose + ECG)                      | C-statistic:<br>1. Male (0.713) for Rose, and (0.717) for Rose + ECG, $p = 0.179$ .<br>2. Female (0.770) for Rose, and (0.786) for Rose + ECG, $p = 0.09$ . | -                                                                                                                        | Integrated discrimination improvement:<br>1. Male (4.01%) $p$ (0.537).<br>2. Female (8.78%) $p$ (0.309). |
| 21 | Auer et al., 2012    | CRFs + ECG                                                         | C-index: 0.58                                                                                                                                               | Hosmer–Lemeshow, calibration: $p = 0.01$ , and $p = 0.03$                                                                | NRI: derived and based: 7.4% and 57%, IDI: 0.99% and 1.03%                                               |
| 22 | Taylor et al., 2001  | CRFs + CAC using EBCT                                              | ROC = 0.62, $p < 0.001$ , and 0.61, $p < 0.001$ .                                                                                                           | -                                                                                                                        | -                                                                                                        |

|    |                       |                                                 |                                                                                                                                            |                                                                                                                      |                                                                                            |
|----|-----------------------|-------------------------------------------------|--------------------------------------------------------------------------------------------------------------------------------------------|----------------------------------------------------------------------------------------------------------------------|--------------------------------------------------------------------------------------------|
| 23 | Rana et al., 2009     | CRFs + CRP + myeloperoxidase in (8) models      | C-statistic for derived and based = (0.65_0.54).                                                                                           | Hosmer–Lemeshow did not perform well.                                                                                | NRI: derived and based on 27.4%, and 6.4%                                                  |
| 24 | Parikh et al., 2016   | CRFs + reproductive factors                     | C-statistic for derived and based 1. Based (0.726) and derived (0.730)                                                                     | -                                                                                                                    | IDI: 0.0013 ( $p < 0.0001$ ), and 0.002 ( $p = 0.04$ ).                                    |
| 25 | De Vries et al., 2015 | GRS (152 SNPs) + CRFs in (3) models             | C-statistic: 1.0.684, 2. 0.716, 3.0.716                                                                                                    | -                                                                                                                    | NRI: derived and based:1. 0.034–0.003, 2.0.01–0.022, 3.0.007–0.017                         |
| 26 | Paynter et al., 2011  | CRFs + (SBP, HDL, and TC) in (3) models         | AUC: 1. Male: 0.701, 0.704, and 0.704, 2. Female: 0.780, 0.785, and 0.785                                                                  | Hosmer–Lemeshow, 1. Male: 12.4 (0.14), 12.3 (0.14), and 13.5 (0.10), 2. Female: 2.1 (0.98), 5.7 (0.68), 13.6 (0.09). | NRI: derived and based, 1. –1.1% (0.47), –0.2% (0.55), 2. 6.4% (0.008), 5.4 (0.016)        |
| 27 | Morrison et al., 2007 | GRS (116 SNPs) + CRFs.                          | AUC: 1. White (GRS + CRFs) = 0.766, and 0.764 for CRFs alone. 2. Black: (GRS + CRFs) = 0.769, and 0.758 for CRFs alone.                    | -                                                                                                                    | -                                                                                          |
| 28 | Folsom et al., 2007   | CRFs + 19 novel risk markers included CRP       | AUC: 1. Basic: (0.767–0.820) 2. Derived: (0.768–0.824)                                                                                     | -                                                                                                                    | -                                                                                          |
| 29 | Detrano et al., 1999  | CRFs + EBCT Calcium score in (4) models         | ROC: derived and based 1. Basic: $0.64 \pm 0.05$ 2. FRS: $0.69 \pm 0.05$ 3. Data derived: $0.68 \pm 0.05$ 4. Derived + Ca: $0.71 \pm 0.04$ | -                                                                                                                    | -                                                                                          |
| 30 | Tada et al., 2016     | GRS (27, and 50 SNPs) + CRFs + FH in (4) models | C-statistic for derived and based (+GRS27, +GRS50, and +FH): 1. Established risk factors: (0.746, 0.748, 0.749, and 0.749)                 | -                                                                                                                    | NRI: derived and based: 1. Established risk factors: 0.20% ( $p < 0.001$ ); 2. Established |

|    |                         |                                                                                                                      |                                                                                                                                                                                                                                                                                                                 |   |                                                                                                                                                                                                                                                                                                                           |
|----|-------------------------|----------------------------------------------------------------------------------------------------------------------|-----------------------------------------------------------------------------------------------------------------------------------------------------------------------------------------------------------------------------------------------------------------------------------------------------------------|---|---------------------------------------------------------------------------------------------------------------------------------------------------------------------------------------------------------------------------------------------------------------------------------------------------------------------------|
|    |                         |                                                                                                                      | respectively; 2. Established risk factors + FH: (0.749, 0.751, 0.752, and NA), respectively.                                                                                                                                                                                                                    |   | risk factors + FH + 27GRS = 0.15% ( $p < 0.001$ ), 3. Established risk factors + FH + 50GRS = 0.17%, $p < 0.0001$                                                                                                                                                                                                         |
| 31 | Aekplakorn et al., 2007 | CRFs + BMI + WC, and waist-to-hip ratio, waist-to-height ratio in (4) models                                         | AUC: 1.0.606, 2.0.627, 3.0.592, 4.0.651                                                                                                                                                                                                                                                                         | - | -                                                                                                                                                                                                                                                                                                                         |
| 32 | Bolton et al., 2013     | GRS (27 SNPs) + CRFs, (4) models for SNPs identified in GWAS and (2) models for SNPs identified in regression trees. | C-index: SNPs identified from (GWAS, and regression trees): (a) GWAS: 1. CHD: 0.761, 0.740, 0.671 and 0.741; 2. Fatal or nonfatal MI or coronary intervention: 0.717, 0.750, 0.718, and 0.753. (b) Regression trees: 1. CHD: 0.686 and 0.709 2. Fatal or nonfatal MI or coronary intervention: 0.694 and 0.718. | - | NRI plus IDI: (a) GWAS: 1. CHD: NRI = 54.4 for both models, IDI = 0.04 for both models, 2. Fatal or nonfatal MI or coronary intervention: NRI = 43.5 and 42.7, IDI = 0.05 for both models, (b) Regression trees: 1. CHD: NRI = 41.5, IDI = 0.04, 2. Fatal or nonfatal MI or coronary intervention: NRI = 42.9, IDI = 0.03 |
| 33 | Lloyd et al., 2004      | CRFs (Framingham) stratified into age and gender tertiles                                                            | Specific index ages: (40–80) per tertiles: 1. Men %: (31.2–16.1), (33.6–14.4), and (46.8–34.2); 2. Women %: (9.7–11.), (15.1–19.6), and (25.9–24.9).                                                                                                                                                            | - | -                                                                                                                                                                                                                                                                                                                         |

|    |                         |                                                                |                                                                                                                                                       |                                                                                                                                               |   |
|----|-------------------------|----------------------------------------------------------------|-------------------------------------------------------------------------------------------------------------------------------------------------------|-----------------------------------------------------------------------------------------------------------------------------------------------|---|
| 34 | Empana et al., 2003     | CRFs (Framingham and PROCAM) in Belfast and France             | C-statistic in prime populations: 1. FRS: 0.66 in Belfast, and 0.68 in France. 2. PROCAM: 0.61 in Belfast, and 0.64 in France                         | 1. Framingham: common ratios were 1.34 in Belfast and 2.35 in France; 2. PROCAM: 1.78 in Belfast, and 2.76 in France                          | - |
| 35 | Rodondi et al., 2012    | CRFs (Framingham) directly and after recalibration             | C-index: Framingham older: c-index = (0.583–0.606) in men and (0.577–0.598) in women                                                                  | Hosmer–Lemeshow, and rifit function (FRS, recalibrated FRS, and refit FRS) 1. Men: 16.27–16.11, and 4.89.; 2. Women: 121.43, 22.73, and 7.96. | - |
| 36 | McGeec han et al., 2008 | CRFs + retinal vascular                                        | AUC: 1. Based: 0.695, 2. Derived: 0706                                                                                                                | -                                                                                                                                             | - |
| 37 | Onat et al., 1997       | CRFs + (DBP)                                                   | -                                                                                                                                                     | -                                                                                                                                             | - |
| 38 | Wilson et al., 1998     | CRFs + TC (NCEP) + BP (JNC_V)                                  | AUC: 1. Men: ?<br>?, 2. Women: ?                                                                                                                      | -                                                                                                                                             | - |
| 39 | Mainous et al., 2008    | CRFs + (Framingham) at baseline visit and 3 and 6 years before | AUC: (baseline visit and 3 and 6 years before) 1. Men: 0.646, 0.667, and 0.649. 2. Women: 0.667, 0.677, and 0.709. 3. Total: 0.720, 0.727, and 0.730. | -                                                                                                                                             | - |
| 40 | Pyorala et al., 1998    | CRFs + OGTT + insulin measurements                             | AUC: (5, 10, 15, and 20) quantiles: 1. Age-adjusted: 3.29, 2.72, 2.14, and 1.61, 2. With                                                              | -                                                                                                                                             | - |

|    |                        |                                              |                                                                                                                                      |                                        |                                                                                                                                                    |
|----|------------------------|----------------------------------------------|--------------------------------------------------------------------------------------------------------------------------------------|----------------------------------------|----------------------------------------------------------------------------------------------------------------------------------------------------|
|    |                        |                                              | AUC glucose: 2.36, 2.29, 1.76, and 1.32.                                                                                             |                                        |                                                                                                                                                    |
| 41 | Hiram et al., 1994     | CRFs + 12 SNPs (apolipoprotein)              | Stringent criteria to classify patient (>60% stenosis), (<10% stenosis)                                                              | -                                      | -                                                                                                                                                  |
| 42 | Bye et al., 2016       | 12 miRS + CRFs and CRFs                      | AUC: derived and baseline 1. 1. Derived: 0.91, 2. FRS 0.72.                                                                          | -                                      | -                                                                                                                                                  |
| 43 | Kavousi et al., 2012   | CRFs + CAC in (12) models                    | C-statistic: increased 0.05 by adding CAC score.                                                                                     | Roche Diagnostics, Mannheim, Germany.  | NRI: 19.3% CAC score                                                                                                                               |
| 44 | Ganna et al., 2013     | GRS (395 SNPs) + CRFs and CRFs in (4) models | C index: 1. Basic model: 0.702. 2. GRS (395 SNPs): Increment = 0.002, 3. CHD (46): Increment = 0.004, 4. polygene: Increment = 0.001 | GrønnesbyBorgan: 0.96, 0.99, and 0.73  | IDI: 0.2, 0.4, and 0.1                                                                                                                             |
| 45 | Cooper et al., 2000    | CRFs + Hemostatic factors                    | AUC:1. Model a (0.54–0.77), 2. Model b (0.66–0.77)                                                                                   | -                                      | -                                                                                                                                                  |
| 46 | Arima et al., 2007     | CRFs + high sensitivity CRP                  | Typical symptoms, abnormal cardiac enzymes                                                                                           | -                                      | -                                                                                                                                                  |
| 47 | Brautbar et al., 2009  | 9p21 + CRFs                                  | AUC: increased from 0.782 to 0.786.                                                                                                  | Grønnesby–Borgan: 20.114, $p = 0.0172$ | NRI: 1. CRFs + 9p21: 0.8% $p = 0.3$ , clinical NRI = 6.2%, $p$ value = 0.03. IDI: 0.002, $p < 0.015$ , 2. CRFs: the clinical NRI 6.8%, IDI: 0.021. |
| 48 | St-Pierre et al., 2006 | CRFs + ApoB (tertiles), LDLC in (3) models   | AUC: Model 1 = 68.9%, Model 2: 70.3%, $p < 0.001$ (Base + ApoB), Model 3: 70.7%, $p < 0.001$ (Base + LDLC)                           | -                                      | -                                                                                                                                                  |
| 49 | Ryoo et al., 2016      | CRFs + ApoB, ApoA, A/B ratio (Quintile)      | -                                                                                                                                    | -                                      | -                                                                                                                                                  |



|    |                         |                                                    |                                                                                                                                                     |                                                                                               |                                                                                                                                                                             |
|----|-------------------------|----------------------------------------------------|-----------------------------------------------------------------------------------------------------------------------------------------------------|-----------------------------------------------------------------------------------------------|-----------------------------------------------------------------------------------------------------------------------------------------------------------------------------|
| 50 | Yarnell et al., 2004    | CRFs + plasma lipid + 3 haemostatic /inflammatory. | AUC: (lipid, haemostatic, and combined): 1. Whole cohort: 0.724, 0.728, and 0.737, 2. Men without CHD: 0.685, 0.693, and 0.707.                     | Hosmer–Lemeshow, 1. 6.37, $p = 0.61$ , 10.46, $p = 0.23$ .                                    | -                                                                                                                                                                           |
| 51 | Everage et al., 2009    | CRFs + CAC score + Racial                          | Perceived racial discrimination score (respond to year 7, and 15 plus cumulative score): OR: 0.88, 0.82, and 0.90.                                  | -                                                                                             | -                                                                                                                                                                           |
| 52 | Iribarren et al., 2015  | CRFs + cardiac troponin I                          | AUC: 1. With hs Troponin = 0.7008, 2. without hs Troponin = 0.6849.                                                                                 | -                                                                                             | NRI: 18% after adding hs Troponin to the models                                                                                                                             |
| 53 | McClelland et al., 2015 | CRFs + CAC                                         | C-statistic derived and basic models: 1. FRS: 0.750 (MESA), 0.720 (HNR), and 0.782 (DHS). 2. FRS + CAC: 0.800 (MESA), 0.779 (HNR), and 0.816 (DHS). | Hosmer–Lemeshow, $p > 0.22$ for each                                                          | Optimal model for CHD risk prediction: Discrimination slope: 1. FRS: 0.052 (MESA), 0.053 (HNR), and 0.046 (DHS)., 2. FRS + CAC: 0.086 (MESA), 0.095 (HNR), and 0.078 (DHS). |
| 54 | Liu et al., 2004        | CRFs (based and after recalibration.               | C-statistic: 1. FRS: 0.705 (men), 0.742 (women). 2. CMCS: 0.736 (men), 0.759 (women).                                                               | Hosmer–Lemeshow, $p < 0.01$                                                                   | No information -                                                                                                                                                            |
| 55 | Brant et al., 2010      | CRFs + BP measurements per age and gender.         | AUC: 1. PP models: 0.83–0.85, 2. BP models: 0.77–0.81                                                                                               | Hosmer–Lemeshow, 1. BLSA $p = 0.75$ , male, $p = 0.02$ in VHM and PP in (female $p = 0.01$ ). |                                                                                                                                                                             |
| 56 | Onat et al., 2010       | CRFs + MetS + CRP per quintiles                    | AUC: 1. Derived models: 0.789 in men, and 0.806 in women., $p < 0.001$ for each.                                                                    | No information -                                                                              | Men and women in the highest quintiles were significantly and 20–27-fold more                                                                                               |

|    |                       |                                        |                                                                                                                                            |                                      |                                                                                                                                              |
|----|-----------------------|----------------------------------------|--------------------------------------------------------------------------------------------------------------------------------------------|--------------------------------------|----------------------------------------------------------------------------------------------------------------------------------------------|
|    |                       |                                        | 2. Without CRP: 0.781 in men, and 0.803 in women. $p < 0.001$ for each, 3. FRS: 0.775 in men, and 0.783 in women. $p < 0.001$ for each.    |                                      | likely to develop CHD than those in the lowest quintiles.                                                                                    |
| 57 | Cross et al., 2012    | CRFs + 19 biomarkers                   | AUC: 2. CHDRA = 0.72, Framingham = 0.73, $p$ value = 0.70.                                                                                 | No information -                     | NRI:1. CHDRA: 25.7% with events, and 17% without events. A clinical NRI = 42.7%, $p < 0.001$ . A clinical NRI = 42.7%, $p$ value $< 0.001$ . |
| 58 | Hadaegh et al., 2012  | CRFs (Framingham) + Electrocardiogram  | C-statistic derived and basic models: 1. reestimated FRS = 0.838, 2. FRS + electrocardiogram = 0.844, 3. combined = 0.843.                 | Hosmer–Lemeshow,                     | NRI: 1. Based = 6.0%, cut point -free NRI = 20.8%                                                                                            |
| 59 | Kang et al., 2012     | CRFs (Framingham) + MetS               | AUC: Men: FRS (0.767), and (0.677) for FRS + MetS, $p < 0.01$ , Women: for FRS (0.777, and (0.733) for FRS + MetS, it was not significant. | -                                    | -                                                                                                                                            |
| 60 | Kivimaki et al., 2011 | CRFs + job strain                      | C-statistic derived and basic models: 1. FRS = 0.7252. FRS + job strain = 0.726.                                                           | Hosmer–Lemeshow was not significant. | NRI: derived model = 0.7% and 1.0%                                                                                                           |
| 61 | Gander et. al., 2015  | CRFs + cardiorespiratory fitness (CRF) | AUC: derived and FRS = 0.80 for both $p = 0.97$                                                                                            | -                                    | -                                                                                                                                            |
| 62 | Arad et al., 2004     | CRFs + CRP + CAC score                 | C-statistic: 1. Without CRP = 0.83, 2. Without CAC score = 0.80, 3. With CAC + CRP = 0.85.                                                 | -                                    | -                                                                                                                                            |

|    |                        |                                                            |                                                                                                                                                                                                                                           |                                                                   |                                                     |
|----|------------------------|------------------------------------------------------------|-------------------------------------------------------------------------------------------------------------------------------------------------------------------------------------------------------------------------------------------|-------------------------------------------------------------------|-----------------------------------------------------|
| 63 | Pischon et al., 2005   | CRFs + ApoB + non-HDL, LDL                                 | -                                                                                                                                                                                                                                         | Hosmer–Lemeshow                                                   | -                                                   |
| 64 | Polak et al., 2015     | CRFs + CCA IMT                                             | C-statistic: 1. Far-wall IMT + CRFs: Increment = 0.012, $p < 0.001$ , mean IMT( $p = 0.004$ ).                                                                                                                                            | $R^2 = 0.31, 0.26$ , and $0.22$ .                                 | NRI: 6%, and 20%.                                   |
| 65 | Cavus et al., 2019     | CRFs + 141 metabolites                                     | C-statistic: 1. 0.756, 2.0.755, 3 + 4. 0.754.                                                                                                                                                                                             | -                                                                 | -                                                   |
| 66 | Subirana et al., 2018  | CRFs + 9 biomarkers                                        | C-index: 1. Without biomarker (%) = 1.74.3, 2. 81.3, and 3. 81.3%, 2. With biomarker (%) = 1.79.3, 2. 82.5, 3. 82.6                                                                                                                       | -                                                                 | NRI: 33.7%                                          |
| 67 | Hindy et al., 2018     | CRFs + GRS (50 SNPs), and smoking                          | AUC: (never, former, and current smokers), 1. FRS:0.747, 0.742, and 0.740.; 2. Derived: 0.797, 0.749, 0.744.                                                                                                                              | -                                                                 | IDI: 0.012, 0.006, and 0.004, $p < 0.0001$ for all. |
| 68 | Chien et al., 2018     | CRFs + (FRS in Taiwanese in (8) models                     | AUC: ranged from 0.804–0.850 by estimates point, and 0.691–0.847 by predicted risks.                                                                                                                                                      | Hosmer–Lemeshow, $p$ (0.10–0.79)                                  | -                                                   |
| 69 | Iribarren et al., 2018 | CRFs + GRS (12 and 51 SNPs) in 3 population (AA, LAT, AS). | C-statistic: (GRS_12, GRS_51)<br>1. AA: 0.687, and 0.687(FRS), and 0.691, and 0.690 (FRS + GRS).,<br>2. LAT: 0.714, and 0.714(FRS), and 0.717, and 0.715 (FRS + GRS).,<br>3. AS: 0.745, and 0.745(FRS), and 0.747, and 0.750 (FRS + GRS). | Hosmer–Lemeshow, $p$ values were not significant over all models. | NRI: overall; 10%, 7%, and 7%.                      |
| 70 | Gunayca et al., 2019   | CRFs + CRFs + BMI, WC, in (6) models                       | AUC: (unadjusted models)<br>1. Men: 0.572–0.600, 2. Female: 0.587–0.652, $p < 0.001$ for both.                                                                                                                                            | -                                                                 | -                                                   |
| 71 | Wang et al., 2019      | CRFs +                                                     | AUC: increased (0.724 to 0.740).                                                                                                                                                                                                          | Cross-validation                                                  | NRI:0.522, $p < 0.001$ , IDI: 0.038, $p = 0.002$    |

|    |                  | CRFs + (19)<br>Metabolites         |   |   |   |
|----|------------------|------------------------------------|---|---|---|
|    |                  | CRFs +                             |   |   |   |
| 72 | Cao et al., 2018 | ApoB (Roche, Kamiya, and Diazyme). | - | - | - |

\* The number refers to supplementary table reference list (see page 18–23 of the Supplementary File). CRFs: Conventional risk factors, FRS: Framingham, EUR: European, AUC: area under receiver characteristic, MIs: myocardial infarction, GRS: genetic risk score, CRFs: conventional risk factors, NRI: net reclassification improvement, IDI: integrated discrimination improvement, EBCT: electron-beam computed tomography, CRP: C-reactive protein, CAC: coronary artery calcification, FH: family history, JNC\_V: joint national committee, NCEP: national cholesterol education program, PB: blood pressure, OGTT: oral glucose tolerance test, hs Troponin: high-sensitivity Troponin I, MetS: metabolic syndrome, CCA: common carotid artery, AA: African American, LAT: Latinos, AS: Asian, BMI: body mass index.

### Reference list of the included studies:

1. Iribarren C, Lu M, Jorgenson E, Martínez M, Lluís-Ganella C, Subirana I, et al. Clinical Utility of Multimarker Genetic Risk Scores for Prediction of Incident Coronary Heart Disease: A Cohort Study Among Over 51 000 Individuals of European Ancestry. *Circulation Cardiovascular genetics*. 2016;9(6):531-40.
2. Hughes MF, Saarela O, Stritzke J, Kee F, Silander K, Klopp N, et al. Genetic markers enhance coronary risk prediction in men: the MORGAM prospective cohorts. *PloS one*. 2012;7(7):e40922-e.
3. Talmud PJ, Cooper JA, Palmen J, Lovering R, Drenos F, Hingorani AD, et al. Chromosome 9p21.3 Coronary Heart Disease Locus Genotype and Prospective Risk of CHD in Healthy Middle-Aged Men. *Clinical Chemistry*. 2008;54(3):467-74.
4. Humphries SE, Cooper JA, Talmud PJ, Miller GJ. Candidate Gene Genotypes, Along with Conventional Risk Factor Assessment, Improve Estimation of Coronary Heart Disease Risk in Healthy UK Men. *Clinical Chemistry*. 2007;53(1):8-16.
5. Beane KE, Cooper JA, Drenos F, Humphries SE. Assessment of the clinical utility of adding common single nucleotide polymorphism genetic scores to classical risk factor algorithms in coronary heart disease risk prediction in UK men. *Clinical chemistry and laboratory medicine*. 2017;55(10):1605-13.
6. Antiochos P, Marques-Vidal P, McDaid A, Waeber G, Vollenweider P. Association between parental history and genetic risk scores for coronary heart disease prediction: The population-based CoLaus study. *Atherosclerosis*. 2016; 244:59-65.
7. Brautbar A, Pompeii LA, Dehghan A, Ngwa JS, Nambi V, Virani SS, et al. A genetic risk score based on direct associations with coronary heart disease improves coronary heart disease risk prediction in the Atherosclerosis Risk in Communities (ARIC), but not in the Rotterdam and Framingham Offspring, Studies. *Atherosclerosis*. 2012;223(2):421-6.
8. Chien KL, Hsu HC, Su TC, Chen MF, Lee YT, Hu FB. Apolipoprotein B and non-high density lipoprotein cholesterol and the risk of coronary heart disease in Chinese. *Journal of lipid research*. 2007;48(11):2499-505.
9. Simmons RK, Sharp S, Boekholdt SM, Sargeant LA, Khaw KT, Wareham NJ, et al. Evaluation of the Framingham risk score in the European Prospective Investigation of Cancer-Norfolk cohort: does adding glycated hemoglobin improve the prediction of coronary heart disease events? *Archives of internal medicine*. 2008;168(11):1209-16.
10. Macleod J, Metcalfe C, Smith GD, Hart C. Does consideration of either psychological or material disadvantage improve coronary risk prediction? Prospective observational study of Scottish men. *J Epidemiol Community Health*. 2007;61(9):833-7.
11. Nishimura K, Okamura T, Watanabe M, Nakai M, Takegami M, Higashiyama A, et al. Predicting Coronary Heart Disease Using Risk Factor Categories for a Japanese Urban Population, and Comparison with the Framingham Risk Score: The Suita Study. *Journal of atherosclerosis and thrombosis*. 2016;23(9):1138-9.
12. Ingelsson E, Schaefer EJ, Contois JH, McNamara JR, Sullivan L, Keyes MJ, et al. Clinical Utility of Different Lipid Measures for Prediction of Coronary Heart Disease in Men and Women. *Jama*. 2007;298(7):776-85.
13. Cao J, Steffen BT, Guan W, Remaley AT, McConnell JP, Palamalai V, et al. A comparison of three apolipoprotein B methods and their associations with incident coronary heart disease risk over a 12-year follow-up period: The Multi-Ethnic Study of Atherosclerosis. *Journal of Clinical Lipidology*. 2018;12(2):300-4.
14. Nambi V, Chambless L, Folsom AR, He M, Hu Y, Mosley T, et al. Carotid Intima-Media Thickness and Presence or Absence of Plaque Improves Prediction of Coronary Heart Disease Risk: The ARIC (Atherosclerosis Risk In Communities) Study. *Journal of the American College of Cardiology*. 2010;55(15):1600-7.
15. Cushman M, Arnold AM, Psaty BM, Manolio TA, Kuller LH, Burke GL, et al. C-Reactive Protein and the 10-Year Incidence of Coronary Heart Disease in Older Men and Women. *Circulation*. 2005;112(1):25-31.

16. Cooper JA, Miller GJ, Humphries SE. A comparison of the PROCAM and Framingham point-scoring systems for estimation of individual risk of coronary heart disease in the Second Northwick Park Heart Study. *Atherosclerosis*. 2005;181(1):93-100.
17. Orford JL, Sesso HD, Stedman M, Gagnon D, Vokonas P, Gaziano JM. A comparison of the Framingham and European society of cardiology coronary heart disease risk prediction models in the normative aging study. *American Heart Journal*. 2002;144(1):95-100.
18. Jee SH, Jang Y, Oh DJ, Oh B-H, Lee SH, Park S-W, et al. A coronary heart disease prediction model: the Korean Heart Study. *BMJ Open*. 2014;4(5):e005025.
19. Merry AH, Boer JM, Schouten LJ, Ambergen T, Steyerberg EW, Feskens EJ, et al. Risk prediction of incident coronary heart disease in The Netherlands: re-estimation and improvement of the SCORE risk function. *European journal of preventive cardiology*. 2012;19(4):840-8.
20. Khalili D, Hadaegh F, Fahimfar N, Shafiee G, Sheikholeslami F, Ghanbarian A, et al. Does an electrocardiogram add predictive value to the rose angina questionnaire for future coronary heart disease? 10-year follow-up in a Middle East population. *J Epidemiol Community Health*. 2012;66(12):1104-9.
21. Auer R, Bauer DC, Marques-Vidal P, Butler J, Min LJ, Cornuz J, et al. Association of major and minor ECG abnormalities with coronary heart disease events. *Jama*. 2012;307(14):1497-505.
22. Taylor AJ, Feuerstein I, Wong H, Barko W, Brazaitis M, O'Malley PG. Do conventional risk factors predict subclinical coronary artery disease? Results from the Prospective Army Coronary Calcium Project. *American Heart Journal*. 2001;141(3):463-8.
23. Rana JS, Cote M, Després JP, Sandhu MS, Talmud PJ, Ninio E, et al. Inflammatory biomarkers and the prediction of coronary events among people at intermediate risk: the EPIC-Norfolk prospective population study. *Heart*. 2009;95(20):1682-7.
24. Parikh NI, Jeppson RP, Berger JS, Eaton CB, Kroenke CH, LeBlanc ES, et al. Reproductive Risk Factors and Coronary Heart Disease in the Women's Health Initiative Observational Study. *Circulation*. 2016;133(22):2149-58.
25. De Vries PS, Kavousi M, Ligthart S, Uitterlinden AG, Hofman A, Franco OH, et al. Incremental predictive value of 152 single nucleotide polymorphisms in the 10-year risk prediction of incident coronary heart disease: the Rotterdam Study. *Int J Epidemiol*. 2015;44(2):682-8.
26. Paynter NP, Crainiceanu CM, Sharrett AR, Chambless LE, Coresh J. Effect of correcting for long-term variation in major coronary heart disease risk factors: relative hazard estimation and risk prediction in the Atherosclerosis Risk in Communities Study. *Ann Epidemiol*. 2012;22(3):191-7.
27. Morrison AC, Bare LA, Chambless LE, Ellis SG, Malloy M, Kane JP, et al. Prediction of Coronary Heart Disease Risk using a Genetic Risk Score: The Atherosclerosis Risk in Communities Study. *American Journal of Epidemiology*. 2007;166(1):28-35.
28. Folsom AR, Chambless LE, Ballantyne CM, Coresh J, Heiss G, Wu KK, et al. An assessment of incremental coronary risk prediction using C-reactive protein and other novel risk markers: the atherosclerosis risk in communities study. *Archives of internal medicine*. 2006;166(13):1368-73.
29. Detrano RC, Wong ND, Doherty TM, Shavelle RM, Tang W, Ginzton LE, et al. Coronary calcium does not accurately predict near-term future coronary events in high-risk adults. *Circulation*. 1999;99(20):2633-8.
30. Tada H, Melander O, Louie JZ, Catanese JJ, Rowland CM, Devlin JJ, et al. Risk prediction by genetic risk scores for coronary heart disease is independent of self-reported family history. *European Heart Journal*. 2015;37(6):561-7.
31. Aekplakorn W, Pakpeankitwatana V, Lee CMY, Woodward M, Barzi F, Yamwong S, et al. Abdominal Obesity and Coronary Heart Disease in Thai Men. *Obesity*. 2007;15(4):1036-42.
32. Bolton JL, Stewart MCW, Wilson JF, Anderson N, Price JF. Improvement in prediction of coronary heart disease risk over conventional risk factors using SNPs identified in genome-wide association studies. *PloSone*. 2013;8(2):e57310-e.

33. Lloyd-Jones DM, Wilson PW, Larson MG, Beiser A, Leip EP, D'Agostino RB, et al. Framingham risk score and prediction of lifetime risk for coronary heart disease. *The American journal of cardiology*. 2004;94(1):20-4.
34. Empana JP, Ducimetière P, Arveiler D, Ferrières J, Evans A, Ruidavets JB, et al. Are the Framingham and PROCAM coronary heart disease risk functions applicable to different European populations?: The PRIME Study. *European Heart Journal*. 2003;24(21):1903-11.
35. Rodondi N, Locatelli I, Aujesky D, Butler J, Vittinghoff E, Simonsick E, et al. Framingham Risk Score and Alternatives for Prediction of Coronary Heart Disease in Older Adults. *PloS one*. 2012;7(3):e34287.
36. McGeehan K, Liew G, Macaskill P, Irwig L, Klein R, Sharrett AR, et al. Risk Prediction of Coronary Heart Disease Based on Retinal Vascular Caliber (from the Atherosclerosis Risk In Communities [ARIC] Study). *The American journal of cardiology*. 2008;102(1):58-63.
37. Onat A, Dursunoğlu D, Sansoy V. Relatively high coronary death and event rates in Turkish women: Relation to three major risk factors in five-year follow-up of cohort. *International Journal of Cardiology*. 1997;61(1):69-77.
38. Wilson PW, D'Agostino RB, Levy D, Belanger AM, Silbershatz H, Kannel WB. Prediction of coronary heart disease using risk factor categories. *Circulation*. 1998;97(18):1837-47.
39. Mainous AG, 3rd, Everett CJ, Player MS, King DE, Diaz VA. Importance of a patient's personal health history on assessments of future risk of coronary heart disease. *Journal of the American Board of Family Medicine : JABFM*. 2008;21(5):408-13.
40. Pyörälä M, Miettinen H, Laakso M, Pyörälä K. Hyperinsulinemia Predicts Coronary Heart Disease Risk in Healthy Middle-aged Men. *Circulation*. 1998;98(5):398-404.
41. Thomsen TF, McGee D, Davidsen M, Jørgensen T. A cross-validation of risk-scores for coronary heart disease mortality based on data from the Glostrup Population Studies and Framingham Heart Study. *International Journal of Epidemiology*. 2002;31(4):817-22.
42. Bye A, Røsjø H, Nauman J, Silva GJJ, Follestad T, Omland T, et al. Circulating microRNAs predict future fatal myocardial infarction in healthy individuals – The HUNT study. *Journal of Molecular and Cellular Cardiology*. 2016; 97:162-8.
43. Kavousi M, Elias-Smale S, Rutten JHW, Leening MJG, Vliegenthart R, Verwoert GC, et al. Evaluation of newer risk markers for coronary heart disease risk classification: a cohort study. *Ann Intern Med*. 2012;156(6):438-44.
44. Ganna A, Magnusson PK, Pedersen NL, de Faire U, Reilly M, Arnlöv J, et al. Multilocus genetic risk scores for coronary heart disease prediction. *Arteriosclerosis, thrombosis, and vascular biology*. 2013;33(9):2267-72.
45. Cooper JA, Miller GJ, Bauer KA, Morrissey JH, Meade TW, Howarth DJ, et al. Comparison of Novel Hemostatic Factors and Conventional Risk Factors for Prediction of Coronary Heart Disease. *Circulation*. 2000;102(23):2816-22.
46. Arima H, Kubo M, Yonemoto K, Doi Y, Ninomiya T, Tanizaki Y, et al. High-sensitivity C-reactive protein and coronary heart disease in a general population of Japanese: the Hisayama study. *Arteriosclerosis, thrombosis, and vascular biology*. 2008;28(7):1385-91.
47. Brautbar A, Ballantyne CM, Lawson K, Nambi V, Chambless L, Folsom AR, et al. Impact of Adding a Single Allele in the 9p21 Locus to Traditional Risk Factors on Reclassification of Coronary Heart Disease Risk and Implications for Lipid-Modifying Therapy in the Atherosclerosis Risk in Communities Study. *Circulation: Cardiovascular Genetics*. 2009;2(3):279-85.
48. St-Pierre AC, Cantin B, Dagenais GR, Després J-P, Lamarche B. Apolipoprotein-B, Low-Density Lipoprotein Cholesterol, and the Long-Term Risk of Coronary Heart Disease in Men. *The American journal of cardiology*. 2006;97(7):997-1001.
49. Ryoo J-H, Park SK, Hong HP, Kim M-G, Ha CS. Clinical significance of serum apolipoproteins as a predictor of coronary heart disease risk in Korean men. *Clinical Endocrinology*. 2016;84(1):63-71.

50. Yarnell JWG, Patterson CC, Sweetnam PM, Lowe GDO. Haemostatic/inflammatory markers predict 10-year risk of IHD at least as well as lipids: the Caerphilly collaborative studies. *European Heart Journal*. 2004;25(12):1049-56.
51. Everage NJ, Gjelsvik A, McGarvey ST, Linkletter CD, Loucks EB. Inverse Associations Between Perceived Racism and Coronary Artery Calcification. *Ann Epidemiol*. 2012;22(3):183-90.
52. Iribarren C, Chandra M, Rana JS, Hlatky MA, Fortmann SP, Quertermous T, et al. High-sensitivity cardiac troponin I and incident coronary heart disease among asymptomatic older adults. *Heart*. 2016;102(15):1177-82.
53. McClelland RL, Jorgensen NW, Budoff M, Blaha MJ, Post WS, Kronmal RA, et al. 10-Year Coronary Heart Disease Risk Prediction Using Coronary Artery Calcium and Traditional Risk Factors: Derivation in the MESA (Multi-Ethnic Study of Atherosclerosis) With Validation in the HNR (Heinz Nixdorf Recall) Study and the DHS (Dallas Heart Study). *Journal of the American College of Cardiology*. 2015;66(15):1643-53.
54. Liu J, Hong Y, D'Agostino S, Ralph B., Wu Z, Wang W, Sun J, et al. Predictive Value for the Chinese Population of the Framingham CHD Risk Assessment Tool Compared With the Chinese Multi-provincial Cohort Study. *Jama*. 2004;291(21):2591-9.
55. Brant LJ, Ferrucci L, Sheng SL, Concin H, Zonderman AB, Kelleher CC, et al. Gender differences in the accuracy of time-dependent blood pressure indices for predicting coronary heart disease: A random-effects modeling approach. *Gender Medicine*. 2010;7(6):616-27.
56. Onat A, Can G, Hergenç G, Uğur M, Yüksel H. Coronary disease risk prediction algorithm warranting incorporation of C-reactive protein in Turkish adults, manifesting sex difference. *Nutrition, Metabolism and Cardiovascular Diseases*. 2012;22(8):643-50.
57. Cross DS, McCarty CA, Hytopoulos E, Beggs M, Nolan N, Harrington DS, et al. Coronary risk assessment among intermediate risk patients using a clinical and biomarker-based algorithm developed and validated in two population cohorts. *Curr Med Res Opin*. 2012;28(11):1819-30.
58. Hadaegh F, Mohebi R, Bozorgmanesh M, Saadat N, Sheikholeslami F, Azizi F. Electrocardiographic abnormalities improve classification of coronary heart disease risk in women: Tehran Lipid and Glucose Study. *Atherosclerosis*. 2012;222(1):110-5.
59. Kang HM, Kim D-J. Metabolic Syndrome versus Framingham Risk Score for Association of Self-Reported Coronary Heart Disease: The 2005 Korean Health and Nutrition Examination Survey. *Diabetes Metab J*. 2012;36(3):237-44.
60. Kivimäki M, Nyberg ST, Batty GD, Shipley MJ, Ferrie JE, Virtanen M, et al. Does adding information on job strain improve risk prediction for coronary heart disease beyond the standard Framingham risk score? The Whitehall II study. *International journal of epidemiology*. 2011;40(6):1577-84.
61. Gander JC, Sui X, Hébert JR, Hazlett LJ, Cai B, Lavie CJ, et al. Association of Cardiorespiratory Fitness With Coronary Heart Disease in Asymptomatic Men. *Mayo Clinic Proceedings*. 2015;90(10):1372-9.
62. Arad Y, Goodman KJ, Roth M, Newstein D, Guerci AD. Coronary Calcification, Coronary Disease Risk Factors, C-Reactive Protein, and Atherosclerotic Cardiovascular Disease Events: The St. Francis Heart Study. *Journal of the American College of Cardiology*. 2005;46(1):158-65.
63. Pischon T, Girman CJ, Sacks FM, Rifai N, Stampfer MJ, Rimm EB. Non-high-density lipoprotein cholesterol and apolipoprotein B in the prediction of coronary heart disease in men. *Circulation*. 2005;112(22):3375-83.
64. Polak JF, Szklo M, O'Leary DH. Associations of Coronary Heart Disease with Common Carotid Artery Near and Far Wall Intima-Media Thickness: The Multi-Ethnic Study of Atherosclerosis. *Journal of the American Society of Echocardiography*. 2015;28(9):1114-21.
65. Cavus E, Karakas M, Ojeda FM, Kontto J, Veronesi G, Ferrario MM, et al. Association of Circulating Metabolites With Risk of Coronary Heart Disease in a European Population: Results From the Biomarkers for Cardiovascular Risk Assessment in Europe (BiomarCaRE) Consortium. *JAMA cardiology*. 2019;4(12):1270-9.



66. Subirana I, Fitó M, Diaz O, Vila J, Francés A, Delpon E, et al. Prediction of coronary disease incidence by biomarkers of inflammation, oxidation, and metabolism. *Scientific reports*. 2018;8(1):3191.
67. Hindy G, Wiberg F, Almgren P, Melander O, Orho-Melander M. Polygenic Risk Score for Coronary Heart Disease Modifies the Elevated Risk by Cigarette Smoking for Disease Incidence. *Circulation: Genomic and Precision Medicine*. 2018;11(1): e001856.
68. Chien KL, Lin HJ, Su TC, Chen YY, Chen PC. Comparing the Consistency and Performance of Various Coronary Heart Disease Prediction Models for Primary Prevention Using a National Representative Cohort in Taiwan. *Circulation journal: official journal of the Japanese Circulation Society*. 2018;82(7):1805-12.
69. Iribarren C, Lu M, Jorgenson E, Martínez M, Lluís-Ganella C, Subirana I, et al. Weighted Multi-marker Genetic Risk Scores for Incident Coronary Heart Disease among Individuals of African, Latino and East-Asian Ancestry. *Scientific reports*. 2018;8(1):6853.
70. Can G, Onat A, Sayılı U, Hayiroğlu M, Ademoglu E, Yurtseven E. Optimal anthropometric measures to predict incidence of coronary heart disease in adults in Turkey. *The National medical journal of India*. 2019; 32:334-41.
71. Wang Z, Zhu C, Nambi V, Morrison AC, Folsom AR, Ballantyne CM, et al. Metabolomic Pattern Predicts Incident Coronary Heart Disease. *Arteriosclerosis, thrombosis, and vascular biology*. 2019;39(7):1475-82.
72. Cao J, Steffen BT, Guan W, Remaley AT, McConnell JP, Palamalai V, et al. A comparison of three apolipoprotein B methods and their associations with incident coronary heart disease risk over a 12-year follow-up period: The Multi-Ethnic Study of Atherosclerosis. *Journal of Clinical Lipidology*. 2018;12(2):300-4.
